# Supplementary material for: Copper(i)–lanthanide(iii) heterometallic metal–organic frameworks constructed from 3-(3-pyridyl)acrylic acid: syntheses, structures, and properties
Source: Royal Society of Chemistry journal article supplement (doi:10.1039/c6ce00637j), 2016-01-01
Supplement: c6ce00637j1.pdf [file c6ce00637j1.pdf]

## Supporting Information

### Copper(I)-lanthanide(III) heterometallic metal-organic frameworks with unique topologies constructed from 3-(3-pyridyl) acrylic acid: syntheses, structures, photoluminescent and magnetic properties

**Table S1.** Selected Bond Distances (Å) and angles (°) for compound **1-17**.

| <b>Compound 1</b>   |            |                    |          |               |            |
|---------------------|------------|--------------------|----------|---------------|------------|
| Dy(1)-O(3)#1        | 2.292(4)   | Dy(1)-O(2)         | 2.465(4) | Cu(2)-Cl(1)   | 2.2010(19) |
| Dy(1)-O(5)          | 2.298(4)   | Dy(1)-O(1)         | 2.476(4) | Cu(2)-Cl(2)   | 2.473(2)   |
| Dy(1)-O(4)          | 2.301(4)   | Cu(1)-N(2)         | 1.914(5) | Cu(3)-Cl(3)   | 2.156(3)   |
| Dy(1)-O(6)#2        | 2.322(4)   | Cu(1)-N(1)#3       | 1.920(6) | Cu(3)-Cl(2)   | 2.186(3)   |
| Dy(1)-O(1W)         | 2.420(4)   | Cu(1)-Cl(1)        | 2.668(2) | Cu(3)-Cl(1)#3 | 2.507(3)   |
| Dy(1)-O(2W)         | 2.443(4)   | Cu(2)-N(3)         | 1.952(6) |               |            |
| O(3)#1-Dy(1)-O(5)   | 148.90(17) | O(5)-Dy(1)-O(1)    |          | 79.01(14)     |            |
| O(3)#1-Dy(1)-O(4)   | 105.68(16) | O(4)-Dy(1)-O(1)    |          | 76.34(14)     |            |
| O(5)-Dy(1)-O(4)     | 83.01(16)  | O(6)#2-Dy(1)-O(1)  |          | 131.08(15)    |            |
| O(3)#1-Dy(1)-O(6)#2 | 80.67(15)  | O(1W)-Dy(1)-O(1)   |          | 145.15(15)    |            |
| O(5)-Dy(1)-O(6)#2   | 105.86(15) | O(2W)-Dy(1)-O(1)   |          | 128.21(13)    |            |
| O(4)-Dy(1)-O(6)#2   | 151.93(16) | O(2)-Dy(1)-O(1)    |          | 53.05(13)     |            |
| O(3)#1-Dy(1)-O(1W)  | 138.42(16) | N(2)-Cu(1)-N(1)#3  |          | 160.6(3)      |            |
| O(5)-Dy(1)-O(1W)    | 71.68(15)  | N(2)-Cu(1)-Cl(1)   |          | 99.40(18)     |            |
| O(4)-Dy(1)-O(1W)    | 81.69(15)  | N(1)#3-Cu(1)-Cl(1) |          | 97.04(18)     |            |
| O(6)#2-Dy(1)-O(1W)  | 76.26(15)  | N(3)-Cu(2)-Cl(1)   |          | 150.0(2)      |            |
| O(3)#1-Dy(1)-O(2W)  | 72.27(16)  | N(3)-Cu(2)-Cl(2)   |          | 105.31(19)    |            |

|                    |            |                     |            |
|--------------------|------------|---------------------|------------|
| O(5)-Dy(1)-O(2W)   | 138.41(16) | Cl(1)-Cu(2)-Cl(2)   | 100.69(9)  |
| O(4)-Dy(1)-O(2W)   | 75.94(15)  | Cl(3)-Cu(3)-Cl(2)   | 139.85(15) |
| O(6)#2-Dy(1)-O(2W) | 80.32(15)  | Cl(3)-Cu(3)-Cl(1)#3 | 110.15(11) |
| O(1W)-Dy(1)-O(2W)  | 70.08(15)  | Cl(2)-Cu(3)-Cl(1)#3 | 108.62(10) |
| O(3)#1-Dy(1)-O(2)  | 78.49(16)  | Cu(3)-Cl(2)-Cu(2)   | 82.33(9)   |
| O(5)-Dy(1)-O(2)    | 72.70(15)  | Cu(2)-Cl(1)-Cu(1)   | 82.82(7)   |
| O(4)-Dy(1)-O(2)    | 126.60(14) | Cu(2)-Cl(1)-Cu(1)   | 106.22(8)  |
| O(6)#2-Dy(1)-O(2)  | 130.21(14) | Cu(3)#3-Cl(1)-Cu(1) | 80.39(7)   |
| O(1W)-Dy(1)-O(2)   | 81.8(3)    | O(2W)-Dy(1)-O(2)    | 147.53(15) |
| O(3)#1-Dy(1)-O(1)  | 74.40(15)  |                     |            |

Symmetry code for:

**1: #1 -x+1,-y+1,-z+1; #2 -x+2,-y+1,-z+1; #3 -x,-y,-z.**

---

### Compound 2

---

|                   |            |                     |          |               |          |
|-------------------|------------|---------------------|----------|---------------|----------|
| Eu(1)-O(5)#2      | 2.326(5)   | Eu(1)-O(1)          | 2.345(5) | Eu(1)-O(6)#1  | 2.350(5) |
| Eu(1)-O(4)        | 2.516(5)   | Eu(1)-O(3)          | 2.500(5) | Eu(1)-O(2W)   | 2.477(5) |
| Eu(1)-O(1W)       | 2.457(5)   | Eu(1)-O(2)#3        | 2.375(5) | O(6)-Eu(1)#1  | 2.349(5) |
| O(2)-Eu(1)#3      | 2.375(5)   | Cu(2)-Cl(2)         | 2.639(3) | Cu(1)-Cl(2)#1 | 2.185(3) |
| Cu(1)-Cl(1)       | 2.476(4)   | Cl(2)-Cu(1)#1       | 2.185(3) |               |          |
| O(5)#2-Eu(1)-O(1) | 148.5(2)   | O(5)#2-Eu(1)-O(6)#1 |          | 105.4(2)      |          |
| O(1W)-Eu(1)-O(4)  | 145.76(18) | O(2)#3-Eu(1)-O(4)   |          | 130.59(18)    |          |
| O(6)#1-Eu(1)-O(4) | 76.40(18)  | O(1)-Eu(1)-O(4)     |          | 78.64(17)     |          |
| O(5)#2-Eu(1)-O(4) | 73.57(19)  | O(2W)-Eu(1)-O(3)    |          | 148.06(19)    |          |
| O(1W)-Eu(1)-O(3)  | 131.05(17) | O(2)#3-Eu(1)-O(3)   |          | 82.22(18)     |          |

|                        |            |                      |            |
|------------------------|------------|----------------------|------------|
| O(6)#1-Eu(1)-O(3)      | 125.46(19) | O(1)-Eu(1)-O(3)      | 72.49(18)  |
| O(5)#2-Eu(1)-O(3)      | 78.8(2)    | O(1W)-Eu(1)-O(2W)    | 69.68(18)  |
| O(2)#3-Eu(1)-O(2W)     | 80.09(19)  | O(6)#1-Eu(1)-O(2W)   | 76.21(19)  |
| O(1)-Eu(1)-O(2W)       | 138.50(19) | O(5)#2-Eu(1)-O(2W)   | 72.2(2)    |
| O(2)#3-Eu(1)-O(1W)     | 76.84(19)  | O(6)#1-Eu(1)-O(1W)   | 81.40(18)  |
| O(1)-Eu(1)-O(1W)       | 72.59(18)  | O(5)#2-Eu(1)-O(1W)   | 138.3(2)   |
| O(6)#1-Eu(1)-O(2)#3    | 152.2(2)   | O(1)-Eu(1)-O(2)#3    | 107.56(18) |
| O(5)#2-Eu(1)-O(2)#3    | 80.6(2)    | O(1)-Eu(1)-O(6)#1    | 81.76(19)  |
| N(3)-Cu(2)-N(2)        | 159.6(3)   | N(3)-Cu(2)-Cl(2)     | 99.65(18)  |
| N(2)-Cu(2)-Cl(2)       | 97.90(19)  | N(1)-Cu(1)-Cl(2)#1   | 148.6(2)   |
| N(1)-Cu(1)-Cl(1)       | 105.8(2)   | Cl(2)#1-Cu(1)-Cl(1)  | 101.11(13) |
| O(3)-Eu(1)-O(4)        | 52.15(16)  | O(2W)-Eu(1)-O(4)     | 127.87(16) |
| Cl(2)#1-Cu(1)-Cu(3A)   | 92.3(2)    | N(1)-Cu(1)-Cu(3A)    | 117.6(3)   |
| Cu(3A)-Cu(1)-Cu(3A)#1  | 111.2(2)   | Cl(1)-Cu(1)-Cu(3A)#1 | 147.0(2)   |
| Cl(2)#1-Cu(1)-Cu(3A)#1 | 48.9(2)    | N(1)-Cu(1)-Cu(3A)#1  | 107.1(3)   |
| Cl(1)-Cu(1)-Cu(3A)     | 48.4(2)    | Cl(1)-Cu(3A)-Cl(2)   | 116.7(5)   |
| Cu(1)-Cu(3A)-Cu(1)#1   | 68.8(2)    | Cl(3)-Cu(3A)-Cu(1)#1 | 104.9(4)   |

---

Symmetry code for:

**2: #1 -x+2,-y+1,-z+1; #2 x-1,y-1,z-1; #3 -x,-y,-z; #4 x+1,y+1,z+1.**

---

**Compound 3**

|              |          |              |          |              |           |
|--------------|----------|--------------|----------|--------------|-----------|
| Gd(1)-O(6)#1 | 2.319(7) | Gd(1)-O(5)#2 | 2.335(6) | Gd(1)-O(2)#3 | 2.340(7)  |
| Gd(1)-O(4)   | 2.494(7) | Gd(1)-O(3)   | 2.490(7) | Gd(1)-O(2W)  | 2.465(6)  |
| Gd(1)-O(1W)  | 2.453(7) | Gd(1)-O(1)   | 2.358(6) | Cu(3)-N(1)#3 | 1.957(11) |

|                     |          |                      |           |             |          |
|---------------------|----------|----------------------|-----------|-------------|----------|
| Cu(1)-N(3)          | 1.902(9) | Cu(1)-N(2)           | 1.925(11) | Cu(1)-Cl(1) | 2.626(4) |
| Cu(2)-Cl(1)         | 2.579(7) | Cu(2)-Cl(2)          | 2.157(7)  | Cu(2)-Cl(3) | 2.092(7) |
| O(6)#1-Gd(1)-O(5)#2 | 105.1(3) | O(6)#1-Gd(1)-O(2)#3  |           | 148.2(3)    |          |
| O(3)-Gd(1)-O(4)     | 52.5(2)  | O(2W)-Gd(1)-O(4)     |           | 128.1(2)    |          |
| O(1W)-Gd(1)-O(4)    | 144.7(2) | O(1)-Gd(1)-O(4)      |           | 131.3(2)    |          |
| O(2)#3-Gd(1)-O(4)   | 77.8(2)  | O(5)#2-Gd(1)-O(4)    |           | 76.4(2)     |          |
| O(6)#1-Gd(1)-O(4)   | 73.9(3)  | O(2W)-Gd(1)-O(3)     |           | 147.6(2)    |          |
| O(1W)-Gd(1)-O(3)    | 130.8(2) | O(1)-Gd(1)-O(3)      |           | 82.3(2)     |          |
| O(2)#3-Gd(1)-O(3)   | 72.6(2)  | O(5)#2-Gd(1)-O(3)    |           | 126.1(2)    |          |
| O(6)#1-Gd(1)-O(3)   | 78.8(3)  | O(1W)-Gd(1)-O(2W)    |           | 70.3(2)     |          |
| O(1)-Gd(1)-O(2W)    | 79.6(2)  | O(2)#3-Gd(1)-O(2W)   |           | 138.9(2)    |          |
| O(5)#2-Gd(1)-O(2W)  | 76.2(3)  | O(6)#1-Gd(1)-O(2W)   |           | 72.0(3)     |          |
| O(1)-Gd(1)-O(1W)    | 76.9(3)  | O(2)#3-Gd(1)-O(1W)   |           | 72.4(2)     |          |
| O(5)#2-Gd(1)-O(1W)  | 81.0(2)  | O(6)#1-Gd(1)-O(1W)   |           | 138.9(3)    |          |
| O(2)#3-Gd(1)-O(1)   | 108.0(2) | O(5)#2-Gd(1)-O(1)    |           | 151.6(3)    |          |
| O(6)#1-Gd(1)-O(1)   | 81.0(3)  | O(5)#2-Gd(1)-O(2)#3  |           | 81.7(2)     |          |
| N(3)-Cu(1)-N(2)     | 159.7(5) | N(3)-Cu(1)-Cl(1)     |           | 99.6(3)     |          |
| Cl(2)-Cu(2)-Cl(1)   | 107.2(2) | Cl(3)-Cu(2)-Cl(1)    |           | 109.0(3)    |          |
| Cl(3)-Cu(2)-Cl(2)   | 142.5(4) | Cl(1)#2-Cu(3)-Cl(2)  |           | 100.56(19)  |          |
| N(1)#3-Cu(3)-Cl(2)  | 105.4(4) | N(1)#3-Cu(3)-Cl(1)#2 |           | 149.0(4)    |          |
| N(2)-Cu(1)-Cl(1)    | 97.8(3)  |                      |           |             |          |

Symmetry code for:

**3:#1 x+1,y+1,z+1; #2 -x,-y,-z; #3 -x+2,-y+1,-z+1; #4 x-1,y-1,z-1.**

---

**Compound 4**

---

|                     |            |                      |            |               |          |
|---------------------|------------|----------------------|------------|---------------|----------|
| Tb(1)-O(6)#1        | 2.305(5)   | Tb(1)-O(2)#2         | 2.313(4)   | Tb(1)-O(5)#3  | 2.317(5) |
| Tb(1)-O(3)          | 2.489(5)   | Tb(1)-O(4)           | 2.472(5)   | Tb(1)-O(1W)   | 2.448(5) |
| Tb(1)-O(2W)         | 2.439(5)   | Tb(1)-O(1)           | 2.332(5)   | Cu(2)-Cl(2)   | 2.145(4) |
| Cu(3)-Cl(1)         | 2.197(2)   | Cu(3)-Cl(3)#3        | 2.473(3)   | Cl(3)-Cu(3)#3 | 2.474(3) |
| Cu(1)-N(2)          | 1.917(7)   | Cu(1)-Cl(1)          | 2.659(3)   | Cu(3)-N(1)#4  | 1.948(7) |
| Cu(2)-Cl(3)         | 2.180(4)   | Cu(2)-Cl(1)          | 2.525(4)   | Cu(1)-N(3)    | 1.915(6) |
| O(6)#1-Tb(1)-O(2)#2 | 148.74(19) | O(6)#1-Tb(1)-O(5)#3  | 105.90(19) |               |          |
| O(4)-Tb(1)-O(3)     | 52.65(15)  | O(1W)-Tb(1)-O(3)     | 128.14(16) |               |          |
| O(2W)-Tb(1)-O(3)    | 144.68(17) | O(1)-Tb(1)-O(3)      | 130.88(17) |               |          |
| O(5)#3-Tb(1)-O(3)   | 76.54(17)  | O(2)#2-Tb(1)-O(3)    | 78.90(16)  |               |          |
| O(6)#1-Tb(1)-O(3)   | 74.18(17)  | O(1W)-Tb(1)-O(4)     | 147.44(17) |               |          |
| O(2W)-Tb(1)-O(4)    | 130.52(16) | O(1)-Tb(1)-O(4)      | 81.69(17)  |               |          |
| O(5)#3-Tb(1)-O(4)   | 126.23(17) | O(2)#2-Tb(1)-O(4)    | 72.50(17)  |               |          |
| O(6)#1-Tb(1)-O(4)   | 78.59(19)  | O(2W)-Tb(1)-O(1W)    | 70.45(17)  |               |          |
| O(1)-Tb(1)-O(1W)    | 80.00(17)  | O(5)#3-Tb(1)-O(1W)   | 76.34(18)  |               |          |
| O(2)#2-Tb(1)-O(1W)  | 138.79(18) | O(6)#1-Tb(1)-O(1W)   | 72.01(19)  |               |          |
| O(1)-Tb(1)-O(2W)    | 77.10(18)  | O(5)#3-Tb(1)-O(2W)   | 80.85(17)  |               |          |
| O(2)#2-Tb(1)-O(2W)  | 71.51(17)  | O(6)#1-Tb(1)-O(2W)   | 138.91(18) |               |          |
| O(5)#3-Tb(1)-O(1)   | 151.91(19) | O(2)#2-Tb(1)-O(1)    | 106.29(17) |               |          |
| Cl(2)-Cu(2)-Cl(3)   | 140.62(19) | Cl(2)-Cu(2)-Cl(1)    | 109.70(14) |               |          |
| Cl(1)-Cu(3)-Cl(3)#3 | 100.94(11) | N(1)#4-Cu(3)-Cl(3)#3 | 105.5(2)   |               |          |
| N(1)#4-Cu(3)-Cl(1)  | 149.2(2)   | N(2)-Cu(1)-Cl(1)     | 97.5(2)    |               |          |
| N(3)-Cu(1)-Cl(1)    | 99.2(2)    | N(3)-Cu(1)-N(2)      | 160.5(3)   |               |          |

Cl(3)-Cu(2)-Cl(1) 108.33(13)

Symmetry code for:

**4:#1** x+1,y+1,z+1; **#2** -x+2,-y+2,-z+1; **#3** -x,-y+1,-z; **#4** x-2,y-1,z-1; **#5** x-1,y-1,z-1;  
**#6** x+2,y+1,z+1.

---

**Compound 5**

---

|                     |            |                     |            |               |            |
|---------------------|------------|---------------------|------------|---------------|------------|
| Dy(1)-O(2)#1        | 2.285(3)   | Dy(1)-O(4)          | 2.539(3)   | Cu(1)-N(3)    | 2.077(4)   |
| Dy(1)-O(1)          | 2.373(3)   | Dy(1)-O(2W)         | 2.548(3)   | Cu(1)-I(1)#4  | 2.6472(8)  |
| Dy(1)-O(5)#2        | 2.395(3)   | Dy(1)-O(6)#2        | 2.825(3)   | Cu(1)-Cu(1)#4 | 2.6672(14) |
| Dy(1)-O(6)#3        | 2.408(3)   | I(1)-Cu(1)#4        | 2.6473(8)  |               |            |
| Dy(1)-O(1W)         | 2.423(3)   | I(1)-Cu(1)          | 2.6586(8)  |               |            |
| Dy(1)-O(3)          | 2.460(3)   | Cu(1)-N(2)          | 2.064(4)   |               |            |
| O(2)#1-Dy(1)-O(1)   | 100.85(12) |                     |            |               |            |
| O(2)#1-Dy(1)-O(5)#2 | 144.39(12) | O(1W)-Dy(1)-O(2W)   | 69.87(11)  |               |            |
| O(1)-Dy(1)-O(5)#2   | 78.10(12)  | O(3)-Dy(1)-O(2W)    | 142.12(11) |               |            |
| O(2)#1-Dy(1)-O(6)#3 | 88.31(12)  | O(4)-Dy(1)-O(2W)    | 126.55(10) |               |            |
| O(1)-Dy(1)-O(6)#3   | 147.25(11) | O(2)#1-Dy(1)-O(6)#2 | 143.18(11) |               |            |
| O(5)#2-Dy(1)-O(6)#3 | 111.98(11) | O(1)-Dy(1)-O(6)#2   | 115.70(11) |               |            |
| O(2)#1-Dy(1)-O(1W)  | 81.08(12)  | O(5)#2-Dy(1)-O(6)#2 | 48.69(10)  |               |            |
| O(1)-Dy(1)-O(1W)    | 138.51(11) | O(6)#3-Dy(1)-O(6)#2 | 63.58(12)  |               |            |
| O(5)#2-Dy(1)-O(1W)  | 77.40(12)  | O(1W)-Dy(1)-O(6)#2  | 68.93(11)  |               |            |
| O(6)#3-Dy(1)-O(1W)  | 73.71(11)  | O(3)-Dy(1)-O(6)#2   | 71.73(10)  |               |            |
| O(5)#2-Dy(1)-O(3)   | 88.15(12)  | O(4)-Dy(1)-O(6)#2   | 118.56(10) |               |            |
| O(6)#3-Dy(1)-O(3)   | 75.54(11)  | O(2W)-Dy(1)-O(6)#2  | 112.53(10) |               |            |

|                    |            |                      |            |
|--------------------|------------|----------------------|------------|
| O(1W)-Dy(1)-O(3)   | 137.75(11) | Cu(1)#4-I(1)-Cu(1)   | 60.35(3)   |
| O(2)#1-Dy(1)-O(4)  | 74.50(12)  | N(2)-Cu(1)-N(3)      | 109.22(18) |
| O(1)-Dy(1)-O(4)    | 73.82(11)  | N(2)-Cu(1)-I(1)#4    | 109.99(12) |
| O(5)#2-Dy(1)-O(4)  | 136.30(12) | N(3)-Cu(1)-I(1)#4    | 110.27(11) |
| O(6)#3-Dy(1)-O(4)  | 78.62(11)  | N(2)-Cu(1)-I(1)      | 108.81(12) |
| O(1W)-Dy(1)-O(4)   | 143.37(12) | N(3)-Cu(1)-I(1)      | 105.08(12) |
| O(3)-Dy(1)-O(4)    | 52.24(11)  | I(1)#4-Cu(1)-I(1)    | 113.30(3)  |
| O(2)#1-Dy(1)-O(2W) | 74.25(12)  | N(2)-Cu(1)-Cu(1)#4   | 151.04(13) |
| O(1)-Dy(1)-O(2W)   | 70.91(11)  | N(3)-Cu(1)-Cu(1)#4   | 99.64(12)  |
| O(5)#2-Dy(1)-O(2W) | 71.85(12)  | I(1)#4-Cu(1)-Cu(1)#4 | 60.03(2)   |
| O(6)#3-Dy(1)-O(2W) | 141.49(11) | I(1)-Cu(1)-Cu(1)#4   | 59.61(3)   |

---

Symmetry code for :

**5: #1 -x+1/2, -y+1/2, -z+2; #2 x, -y+2, z+1/2; #3 -x+1/2, y-1/2, -z+3/2; #4 -x+1, y, -z+3/2; #5 x, -y+2, z-1/2; #6 -x+1/2, y+1/2, -z+3/2.**

---

**Compound 6**

|                    |            |                   |            |              |           |
|--------------------|------------|-------------------|------------|--------------|-----------|
| Gd(1)-O(1)         | 2.279(3)   | Gd(1)-O(2)#1      | 2.370(3)   | Gd(1)-O(4)   | 2.395(3)  |
| Gd(1)-C(17)#3      | 2.862(4)   | Gd(1)-O(3)        | 2.819(3)   | Gd(1)-O(1W)  | 2.547(3)  |
| Gd(1)-O(5)#3       | 2.536(3)   | Gd(1)-O(6)#3      | 2.462(3)   | Gd(1)-O(2W)  | 2.425(3)  |
| Gd(1)-O(3)#2       | 2.402(3)   | I(1)-Cu(1)        | 2.6497(8)  | I(1)-Cu(1)#4 | 2.6581(7) |
| Cu(1)-Cu(1)#4      | 2.6604(12) | Cu(1)-I(1)#4      | 2.6580(7)  | Cu(1)-N(2)   | 2.084(4)  |
| Cu(1)-N(3)         | 2.062(4)   | O(5)-Gd(1)#5      | 2.536(3)   | O(6)-Gd(1)#5 | 2.462(3)  |
| O(1)-Gd(1)-O(2)#1  | 100.68(11) | O(1)-Gd(1)-O(4)   | 143.96(12) |              |           |
| O(3)#2-Gd(1)-O(2W) | 73.56(10)  | O(4)-Gd(1)-O(2W)  | 78.10(11)  |              |           |
| O(1W)-Gd(1)-O(3)   | 112.47(9)  | O(5)#3-Gd(1)-O(3) | 118.58(9)  |              |           |

|                      |            |                     |            |
|----------------------|------------|---------------------|------------|
| O(6)#3-Gd(1)-O(3)    | 71.83(9)   | O(2W)-Gd(1)-O(3)    | 69.23(10)  |
| O(3)#2-Gd(1)-O(3)    | 63.37(10)  | O(4)-Gd(1)-O(3)     | 49.14(9)   |
| O(2)#1-Gd(1)-O(3)    | 116.12(9)  | O(1)-Gd(1)-O(3)     | 142.93(10) |
| O(5)#3-Gd(1)-O(1W)   | 126.66(9)  | O(6)#3-Gd(1)-O(1W)  | 142.07(10) |
| O(2W)-Gd(1)-O(1W)    | 70.02(10)  | O(3)#2-Gd(1)-O(1W)  | 141.68(10) |
| O(4)-Gd(1)-O(1W)     | 71.46(10)  | O(2)#1-Gd(1)-O(1W)  | 71.02(10)  |
| O(1)-Gd(1)-O(1W)     | 74.18(11)  | O(6)#3-Gd(1)-O(5)#3 | 52.30(10)  |
| O(2W)-Gd(1)-O(5)#3   | 142.62(10) | O(3)#2-Gd(1)-O(5)#3 | 78.44(10)  |
| O(4)-Gd(1)-O(5)#3    | 136.47(11) | O(2)#1-Gd(1)-O(5)#3 | 73.67(10)  |
| O(1)-Gd(1)-O(5)#3    | 74.62(11)  | O(2W)-Gd(1)-O(6)#3  | 137.96(10) |
| O(3)#2-Gd(1)-O(6)#3  | 75.37(10)  | O(4)-Gd(1)-O(6)#3   | 88.32(11)  |
| O(2)#1-Gd(1)-O(6)#3  | 73.65(10)  | O(1)-Gd(1)-O(6)#3   | 126.39(11) |
| O(2)#1-Gd(1)-O(2W)   | 139.08(11) | O(1)-Gd(1)-O(2W)    | 80.33(11)  |
| O(4)-Gd(1)-O(3)#2    | 112.24(10) | O(2)#1-Gd(1)-O(3)#2 | 146.94(11) |
| O(1)-Gd(1)-O(3)#2    | 88.51(11)  | O(2)#1-Gd(1)-O(4)   | 78.19(10)  |
| N(3)-Cu(1)-N(2)      | 109.40(16) | N(3)-Cu(1)-I(1)     | 109.86(11) |
| N(3)-Cu(1)-I(1)#4    | 108.83(11) | N(2)-Cu(1)-I(1)     | 110.24(11) |
| I(1)#4-Cu(1)-Cu(1)#4 | 59.77(2)   | I(1)-Cu(1)-Cu(1)#4  | 60.07(2)   |
| N(2)-Cu(1)-Cu(1)#4   | 99.47(11)  | N(3)-Cu(1)-Cu(1)#4  | 151.04(12) |
| I(1)-Cu(1)-I(1)#4    | 113.53(3)  | N(2)-Cu(1)-I(1)#4   | 104.83(10) |

Symmetry code for :

**6: #1 -x+1/2,-y+1/2,-z; #2 -x+1/2,-y+3/2,-z; #3 x,-y+2,z-1/2; #4 -x+1,y,-z+1/2; #5 x,-y+2,z+1/2.**



---

**Compound 7**

---

|                      |            |                      |           |               |            |
|----------------------|------------|----------------------|-----------|---------------|------------|
| Sm(1)-O(1)           | 2.303(3)   | Sm(1)-O(2)#1         | 2.402(3)  | Sm(1)-O(4)    | 2.427(3)   |
| Sm(1)-O(3)           | 2.783(3)   | Sm(1)-O(1W)          | 2.575(3)  | Sm(1)-O(5)#3  | 2.563(3)   |
| Sm(1)-O(6)#3         | 2.492(3)   | Sm(1)-O(2W)          | 2.454(3)  | Sm(1)-O(3)#2  | 2.437(3)   |
| I(1)-Cu(1)           | 2.6487(8)  | I(1)-Cu(1)#4         | 2.6611(8) | Cu(1)-N(3)    | 2.055(5)   |
| Cu(1)-N(2)           | 2.077(4)   | Cu(1)-I(1)#4         | 2.6611(8) | Cu(1)-Cu(1)#4 | 2.6710(15) |
| O(6)-Sm(1)#5         | 2.492(3)   | O(5)-Sm(1)#5         | 2.563(3)  |               |            |
| O(2)#1-Sm(1)-O(4)    | 77.66(11)  | O(1)-Sm(1)-O(3)#2    |           | 88.26(12)     |            |
| O(2)#1-Sm(1)-O(3)#2  | 146.68(11) | O(4)-Sm(1)-O(3)#2    |           | 112.70(11)    |            |
| O(1)-Sm(1)-O(2W)     | 79.93(12)  | O(2)#1-Sm(1)-O(2W)   |           | 139.00(12)    |            |
| O(4)-Sm(1)-O(2W)     | 78.34(12)  | O(3)#2-Sm(1)-O(2W)   |           | 73.87(11)     |            |
| O(1)-Sm(1)-O(2)#1    | 101.25(12) | O(1)-Sm(1)-O(4)      |           | 143.80(12)    |            |
| O(3)-Sm(1)-C(17)#3   | 95.53(12)  | O(1W)-Sm(1)-C(17)#3  |           | 140.53(11)    |            |
| O(5)#3-Sm(1)-C(17)#3 | 25.89(13)  | O(6)#3-Sm(1)-C(17)#3 |           | 25.83(13)     |            |
| O(2W)-Sm(1)-C(17)#3  | 148.42(12) | O(3)#2-Sm(1)-C(17)#3 |           | 74.57(11)     |            |
| O(4)-Sm(1)-C(17)#3   | 113.49(14) | O(2)#1-Sm(1)-C(17)#3 |           | 72.35(12)     |            |
| O(1)-Sm(1)-C(17)#3   | 100.10(14) | O(1W)-Sm(1)-O(3)     |           | 112.57(10)    |            |
| O(5)#3-Sm(1)-O(3)    | 118.95(10) | O(6)#3-Sm(1)-O(3)    |           | 72.58(10)     |            |
| O(2W)-Sm(1)-O(3)     | 69.51(10)  | O(3)#2-Sm(1)-O(3)    |           | 63.80(12)     |            |
| O(4)-Sm(1)-O(3)      | 49.15(10)  | O(2)#1-Sm(1)-O(3)    |           | 115.55(10)    |            |
| O(1)-Sm(1)-O(3)      | 142.90(11) | O(5)#3-Sm(1)-O(1W)   |           | 126.03(10)    |            |
| O(6)#3-Sm(1)-O(1W)   | 141.85(12) | O(2W)-Sm(1)-O(1W)    |           | 70.32(11)     |            |

|                     |            |                      |            |
|---------------------|------------|----------------------|------------|
| O(3)#2-Sm(1)-O(1W)  | 142.24(11) | O(4)-Sm(1)-O(1W)     | 71.34(11)  |
| O(2)#1-Sm(1)-O(1W)  | 70.70(11)  | O(1)-Sm(1)-O(1W)     | 74.23(12)  |
| O(6)#3-Sm(1)-O(5)#3 | 51.70(11)  | O(2W)-Sm(1)-O(5)#3   | 142.61(12) |
| O(3)#2-Sm(1)-O(5)#3 | 78.41(10)  | O(4)-Sm(1)-O(5)#3    | 136.49(12) |
| O(2)#1-Sm(1)-O(5)#3 | 73.65(11)  | O(1)-Sm(1)-O(5)#3    | 74.59(12)  |
| O(2W)-Sm(1)-O(6)#3  | 138.71(11) | O(3)#2-Sm(1)-O(6)#3  | 75.25(11)  |
| O(4)-Sm(1)-O(6)#3   | 89.12(12)  | O(2)#1-Sm(1)-O(6)#3  | 73.31(11)  |
| O(1)-Sm(1)-O(6)#3   | 125.72(12) | N(3)-Cu(1)-N(2)      | 108.94(18) |
| I(1)-Cu(1)-Cu(1)#4  | 60.03(2)   | I(1)#4-Cu(1)-Cu(1)#4 | 59.57(3)   |
| N(2)-Cu(1)-Cu(1)#4  | 99.74(13)  | N(3)-Cu(1)-Cu(1)#4   | 151.19(13) |
| N(2)-Cu(1)-I(1)#4   | 104.68(12) | I(1)-Cu(1)-I(1)#4    | 113.41(3)  |
| N(2)-Cu(1)-I(1)     | 110.47(11) | N(3)-Cu(1)-I(1)#4    | 108.83(12) |

Symmetry code for :

7: #1  $-x+1/2, -y+5/2, -z$ ; #2  $-x+1/2, -y+3/2, -z$ ; #3  $x, -y+1, z-1/2$ ; #4  $-x+1, y, -z+1/2$ ; #5  $x, -y+1, z+1/2$ .

---

### Compound 8

---

|              |          |              |          |              |          |
|--------------|----------|--------------|----------|--------------|----------|
| Tb(1)-O(1)   | 2.262(3) | Tb(1)-O(2)#1 | 2.359(3) | Tb(1)-O(4)   | 2.373(3) |
| Tb(1)-O(6)#3 | 2.528(3) | Tb(1)-O(1W)  | 2.528(3) | Tb(1)-O(5)#3 | 2.446(3) |

|                     |            |                      |           |               |            |
|---------------------|------------|----------------------|-----------|---------------|------------|
| Tb(1)-O(2W)         | 2.408(3)   | Tb(1)-O(3)#2         | 2.376(3)  | I(2)-Cu(3)    | 2.6563(8)  |
| Tb(1)-O(3)          | 2.875(3)   | I(2)-Cu(3)#4         | 2.6531(8) | Cu(3)-N(3)    | 2.064(4)   |
| Cu(3)-N(2)          | 2.080(4)   | Cu(3)-I(2)#4         | 2.6531(8) | Cu(3)-Cu(3)#4 | 2.6708(14) |
| O(5)-Tb(1)#5        | 2.446(3)   | O(6)-Tb(1)#5         | 2.528(3)  |               |            |
| O(1)-Tb(1)-O(2)#1   | 101.31(11) | O(1)-Tb(1)-O(4)      |           | 144.94(13)    |            |
| O(1W)-Tb(1)-O(6)#3  | 127.25(10) | O(5)#3-Tb(1)-O(6)#3  |           | 52.36(11)     |            |
| O(2W)-Tb(1)-O(6)#3  | 142.75(11) | O(3)#2-Tb(1)-O(6)#3  |           | 78.52(11)     |            |
| O(4)-Tb(1)-O(6)#3   | 135.83(12) | O(2)#1-Tb(1)-O(6)#3  |           | 73.98(11)     |            |
| O(1)-Tb(1)-O(6)#3   | 74.98(12)  | O(5)#3-Tb(1)-O(1W)   |           | 142.16(11)    |            |
| O(2W)-Tb(1)-O(1W)   | 70.09(11)  | O(3)#2-Tb(1)-O(1W)   |           | 141.21(11)    |            |
| O(4)-Tb(1)-O(1W)    | 72.40(11)  | O(2)#1-Tb(1)-O(1W)   |           | 71.33(11)     |            |
| O(1)-Tb(1)-O(1W)    | 74.35(12)  | O(2W)-Tb(1)-O(5)#3   |           | 137.23(10)    |            |
| O(3)#2-Tb(1)-O(5)#3 | 75.59(11)  | O(4)-Tb(1)-O(5)#3    |           | 87.19(12)     |            |
| O(2)#1-Tb(1)-O(5)#3 | 73.55(11)  | O(1)-Tb(1)-O(5)#3    |           | 126.79(12)    |            |
| O(3)#2-Tb(1)-O(2W)  | 73.02(12)  | O(4)-Tb(1)-O(2W)     |           | 77.96(12)     |            |
| O(2)#1-Tb(1)-O(2W)  | 139.22(12) | O(1)-Tb(1)-O(2W)     |           | 80.59(12)     |            |
| O(4)-Tb(1)-O(3)#2   | 111.15(11) | O(2)#1-Tb(1)-O(3)#2  |           | 147.18(12)    |            |
| O(1)-Tb(1)-O(3)#2   | 88.31(12)  | O(2)#1-Tb(1)-O(4)    |           | 78.32(11)     |            |
| O(6)#3-Tb(1)-O(3)   | 117.60(10) | O(1W)-Tb(1)-O(3)     |           | 112.73(10)    |            |
| O(5)#3-Tb(1)-O(3)   | 70.74(10)  | O(2W)-Tb(1)-O(3)     |           | 69.50(10)     |            |
| O(3)#2-Tb(1)-O(3)   | 63.28(12)  | O(4)-Tb(1)-O(3)      |           | 48.19(10)     |            |
| O(2)#1-Tb(1)-O(3)   | 115.22(10) | N(3)-Cu(3)-I(2)#4    |           | 109.84(13)    |            |
| N(2)-Cu(3)-I(2)#4   | 110.19(12) | N(3)-Cu(3)-I(2)      |           | 108.90(12)    |            |
| I(2)-Cu(3)-Cu(3)#4  | 59.74(3)   | I(2)#4-Cu(3)-Cu(3)#4 |           | 59.86(3)      |            |

|                    |            |                    |            |
|--------------------|------------|--------------------|------------|
| N(2)-Cu(3)-Cu(3)#4 | 99.35(12)  | N(3)-Cu(3)-Cu(3)#4 | 151.12(12) |
| I(2)#4-Cu(3)-I(2)  | 113.09(3)  | N(2)-Cu(3)-I(2)    | 105.23(12) |
| O(1)-Tb(1)-O(3)    | 143.26(11) | N(3)-Cu(3)-N(2)    | 109.46(17) |

Symmetry code for :

**8: #1 -x+3/2,-y+1/2,-z+1; #2 -x+3/2,-y+3/2,-z+1; #3 x,-y+2,z+1/2; #4 -x+1,y,-z+1/2; #5 x,-y+2,z-1/2.**

---

### Compound 9

---

|                   |           |                   |            |               |            |
|-------------------|-----------|-------------------|------------|---------------|------------|
| Eu(1)-O(2)#1      | 2.292(5)  | Eu(1)-O(1)        | 2.380(5)   | Eu(1)-O(4)    | 2.401(5)   |
| Eu(1)-Eu(1)#2     | 4.4714(8) | Eu(1)-C(17)#3     | 2.869(8)   | Eu(1)-O(3)    | 2.826(5)   |
| Eu(1)-O(2W)       | 2.558(5)  | Eu(1)-O(5)#3      | 2.542(5)   | Eu(1)-O(6)#3  | 2.465(5)   |
| Eu(1)-O(1W)       | 2.432(5)  | Eu(1)-O(3)#2      | 2.426(5)   | Br(1)-Cu(3)   | 2.4889(15) |
| Cu(3)-N(2)        | 2.028(7)  | Cu(3)-Br(1)#4     | 2.5419(15) | Cu(3)-Cu(3)#4 | 2.903(2)   |
| Cu(3)-N(3)        | 2.024(7)  | Br(1)-Cu(3)#4     | 2.5419(15) |               |            |
| O(2)#1-Eu(1)-O(1) | 99.98(18) | O(2)#1-Eu(1)-O(4) |            | 145.20(19)    |            |

|                       |            |                     |            |
|-----------------------|------------|---------------------|------------|
| O(4)-Eu(1)-O(3)       | 48.86(15)  | O(1)-Eu(1)-O(3)     | 115.81(16) |
| O(2)#1-Eu(1)-O(3)     | 143.95(16) | O(5)#3-Eu(1)-O(2W)  | 127.48(17) |
| O(6)#3-Eu(1)-O(2W)    | 141.97(17) | O(1W)-Eu(1)-O(2W)   | 70.11(16)  |
| O(3)#2-Eu(1)-O(2W)    | 140.72(16) | O(4)-Eu(1)-O(2W)    | 72.54(17)  |
| O(1)-Eu(1)-O(2W)      | 71.15(16)  | O(2)#1-Eu(1)-O(2W)  | 73.84(18)  |
| O(6)#3-Eu(1)-O(5)#3   | 51.43(19)  | O(1W)-Eu(1)-O(5)#3  | 144.20(17) |
| O(3)#2-Eu(1)-O(5)#3   | 78.70(17)  | O(4)-Eu(1)-O(5)#3   | 134.31(18) |
| O(1)-Eu(1)-O(5)#3     | 73.79(17)  | O(2)#1-Eu(1)-O(5)#3 | 75.21(19)  |
| O(1W)-Eu(1)-O(6)#3    | 137.00(17) | O(3)#2-Eu(1)-O(6)#3 | 76.41(17)  |
| O(4)-Eu(1)-O(6)#3     | 86.77(19)  | O(1)-Eu(1)-O(6)#3   | 73.41(17)  |
| O(2)#1-Eu(1)-O(6)#3   | 126.3(2)   | O(3)#2-Eu(1)-O(1W)  | 72.97(16)  |
| O(4)-Eu(1)-O(1W)      | 77.79(18)  | O(2)#1-Eu(1)-O(1W)  | 82.66(18)  |
| O(1)-Eu(1)-O(1W)      | 138.65(18) | O(4)-Eu(1)-O(3)#2   | 112.14(17) |
| O(1)-Eu(1)-O(3)#2     | 147.75(17) | O(2)#1-Eu(1)-O(3)#2 | 88.76(18)  |
| O(1)-Eu(1)-O(4)       | 77.38(17)  | O(3)#2-Eu(1)-O(3)   | 63.50(19)  |
| O(5)#3-Eu(1)-O(3)     | 117.47(17) | O(2W)-Eu(1)-O(3)    | 112.59(15) |
| O(6)#3-Eu(1)-O(3)     | 71.63(16)  | O(1W)-Eu(1)-O(3)    | 67.99(16)  |
| N(3)-Cu(3)-N(2)       | 115.4(3)   | N(3)-Cu(3)-Br(1)    | 116.5(2)   |
| Br(1)#4-Cu(3)-Cu(3)#4 | 53.90(4)   | Br(1)-Cu(3)-Cu(3)#4 | 55.61(4)   |
| N(2)-Cu(3)-Cu(3)#4    | 96.74(18)  | N(3)-Cu(3)-Cu(3)#4  | 147.3(2)   |
| Br(1)-Cu(3)-Br(1)#4   | 103.96(5)  | N(2)-Cu(3)-Br(1)#4  | 107.67(19) |
| N(3)-Cu(3)-Br(1)#4    | 107.4(2)   | N(2)-Cu(3)-Br(1)    | 105.0(2)   |

Symmetry code for :

**9: #1 -x,-y-1,-z+1; #2 -x,-y,-z+1; #3 x-1/2,-y+1/2,z-1/2; #4 -x,y,-z+3/2; #5 x+1/2,-y+1/2,z+1/2.**

---

**Compound 10**

---

|                     |            |                     |            |              |          |
|---------------------|------------|---------------------|------------|--------------|----------|
| La(1)-O(2)#1        | 2.382(6)   | La(1)-O(1)          | 2.487(5)   | La(1)-O(4)#2 | 2.527(5) |
| La(1)-O(3)#2        | 2.794(5)   | La(1)-O(1W)         | 2.632(5)   | La(1)-O(6)#3 | 2.631(6) |
| La(1)-O(5)#3        | 2.567(6)   | La(1)-O(2W)         | 2.556(5)   | La(1)-O(3)   | 2.541(5) |
| Br(1)-Cu(1)         | 2.5089(17) | Br(1)-Cu(1)#4       | 2.5096(17) | Cu(1)-N(2)   | 2.026(8) |
| Cu(1)-N(3)          | 2.039(8)   | Cu(1)-Br(1)#4       | 2.5095(17) | O(3)-La(1)#2 | 2.794(5) |
| O(4)-La(1)#2        | 2.527(5)   | O(5)-La(1)#5        | 2.567(6)   | O(6)-La(1)#5 | 2.631(6) |
| O(2)#1-La(1)-O(1)   | 102.41(19) | O(2)#1-La(1)-O(4)#2 | 143.9(2)   |              |          |
| O(1W)-La(1)-O(3)#2  | 111.50(16) | O(6)#3-La(1)-O(3)#2 | 119.6(2)   |              |          |
| O(5)#3-La(1)-O(3)#2 | 74.19(19)  | O(2W)-La(1)-O(3)#2  | 68.80(17)  |              |          |
| O(3)-La(1)-O(3)#2   | 63.92(18)  | O(4)#2-La(1)-O(3)#2 | 48.93(16)  |              |          |
| O(1)-La(1)-O(3)#2   | 113.59(16) | O(2)#1-La(1)-O(3)#2 | 143.64(18) |              |          |
| O(6)#3-La(1)-O(1W)  | 126.1(2)   | O(5)#3-La(1)-O(1W)  | 142.71(19) |              |          |
| O(2W)-La(1)-O(1W)   | 70.66(17)  | O(3)-La(1)-O(1W)    | 141.72(17) |              |          |
| O(4)#2-La(1)-O(1W)  | 70.76(18)  | O(1)-La(1)-O(1W)    | 71.45(17)  |              |          |
| O(2)#1-La(1)-O(1W)  | 74.58(19)  | O(5)#3-La(1)-O(6)#3 | 49.7(2)    |              |          |
| O(2W)-La(1)-O(6)#3  | 143.4(2)   | O(3)-La(1)-O(6)#3   | 79.83(18)  |              |          |
| O(4)#2-La(1)-O(6)#3 | 135.4(2)   | O(1)-La(1)-O(6)#3   | 73.3(2)    |              |          |
| O(2)#1-La(1)-O(6)#3 | 74.7(2)    | O(2W)-La(1)-O(5)#3  | 138.7(2)   |              |          |
| O(3)-La(1)-O(5)#3   | 74.96(18)  | O(4)#2-La(1)-O(5)#3 | 90.8(2)    |              |          |
| O(1)-La(1)-O(5)#3   | 72.74(19)  | O(2)#1-La(1)-O(5)#3 | 123.7(2)   |              |          |
| O(3)-La(1)-O(2W)    | 72.81(17)  | O(4)#2-La(1)-O(2W)  | 78.63(19)  |              |          |
| O(1)-La(1)-O(2W)    | 139.48(19) | O(2)#1-La(1)-O(2W)  | 80.8(2)    |              |          |

|                     |            |                    |            |
|---------------------|------------|--------------------|------------|
| O(4)#2-La(1)-O(3)   | 112.62(17) | O(1)-La(1)-O(3)    | 146.72(18) |
| O(2)#1-La(1)-O(3)   | 88.80(19)  | O(1)-La(1)-O(4)#2  | 75.86(18)  |
| N(2)-Cu(1)-N(3)     | 115.1(3)   | N(2)-Cu(1)-Br(1)   | 109.9(2)   |
| Br(1)-Cu(1)-Br(1)#4 | 105.02(6)  | N(3)-Cu(1)-Br(1)#4 | 104.6(2)   |
| N(2)-Cu(1)-Br(1)#4  | 113.1(2)   | N(3)-Cu(1)-Br(1)   | 108.5(2)   |

Symmetry code for :

**10: #1 -x+2,-y+2,-z+2; #2 -x+2,-y+3,-z+2; #3 -x+3/2,y+1/2,-z+3/2; #4 -x+2,y,-z+3/2; #5 -x+3/2,y-1/2,-z+3/2.**

---

### Compound 11

---

|                    |            |                     |            |              |            |
|--------------------|------------|---------------------|------------|--------------|------------|
| Nd(1)-O(1)#1       | 2.334(4)   | Nd(1)-O(2)          | 2.434(3)   | Nd(1)-O(6)#2 | 2.458(3)   |
| Nd(1)-O(5)#2       | 2.775(3)   | Nd(1)-O(3)          | 2.594(4)   | Nd(1)-O(2W)  | 2.588(3)   |
| Nd(1)-O(4)         | 2.505(4)   | Nd(1)-O(5)#3        | 2.485(3)   | Nd(1)-O(1W)  | 2.475(3)   |
| Cu(3)-N(2)         | 2.019(5)   | Cu(3)-N(3)          | 2.040(6)   | Cu(3)-Br(2)  | 2.5091(11) |
| Cu(3)-Br(2)#4      | 2.5290(12) | Br(2)-Cu(3)#4       | 2.5289(12) | O(5)-Nd(1)#5 | 2.485(3)   |
| O(5)-Nd(1)#6       | 2.775(3)   |                     |            |              |            |
| O(1)#1-Nd(1)-O(2)  | 100.40(12) | O(1)#1-Nd(1)-O(6)#2 | 144.56(14) |              |            |
| O(3)-Nd(1)-O(5)#2  | 118.80(12) | O(2W)-Nd(1)-O(5)#2  | 111.89(10) |              |            |
| O(4)-Nd(1)-O(5)#2  | 72.94(12)  | O(5)#3-Nd(1)-O(5)#2 | 63.82(12)  |              |            |
| O(1W)-Nd(1)-O(5)#2 | 68.85(11)  | O(6)#2-Nd(1)-O(5)#2 | 49.13(10)  |              |            |
| O(2)-Nd(1)-O(5)#2  | 115.20(11) | O(1)#1-Nd(1)-O(5)#2 | 144.08(11) |              |            |
| O(2W)-Nd(1)-O(3)   | 126.83(12) | O(4)-Nd(1)-O(3)     | 50.86(14)  |              |            |
| O(5)#3-Nd(1)-O(3)  | 79.22(11)  | O(1W)-Nd(1)-O(3)    | 143.28(13) |              |            |
| O(6)#2-Nd(1)-O(3)  | 134.77(14) | O(2)-Nd(1)-O(3)     | 73.28(12)  |              |            |

|                       |            |                     |            |
|-----------------------|------------|---------------------|------------|
| O(1)#1-Nd(1)-O(3)     | 74.64(15)  | O(4)-Nd(1)-O(2W)    | 142.64(12) |
| O(5)#3-Nd(1)-O(2W)    | 140.83(11) | O(1W)-Nd(1)-O(2W)   | 69.90(11)  |
| O(6)#2-Nd(1)-O(2W)    | 71.74(12)  | O(2)-Nd(1)-O(2W)    | 71.69(12)  |
| O(1)#1-Nd(1)-O(2W)    | 73.86(13)  | O(5)#3-Nd(1)-O(4)   | 75.79(12)  |
| O(1W)-Nd(1)-O(4)      | 138.30(13) | O(6)#2-Nd(1)-O(4)   | 88.45(14)  |
| O(2)-Nd(1)-O(4)       | 73.08(12)  | O(1)#1-Nd(1)-O(4)   | 125.03(15) |
| O(1W)-Nd(1)-O(5)#3    | 72.90(11)  | O(6)#2-Nd(1)-O(5)#3 | 112.76(11) |
| O(2)-Nd(1)-O(5)#3     | 147.19(12) | O(1)#1-Nd(1)-O(5)#3 | 89.01(12)  |
| O(6)#2-Nd(1)-O(1W)    | 79.14(13)  | O(2)-Nd(1)-O(1W)    | 139.34(12) |
| O(1)#1-Nd(1)-O(1W)    | 81.37(13)  | O(2)-Nd(1)-O(6)#2   | 76.68(12)  |
| N(2)-Cu(3)-N(3)       | 114.8(2)   | N(2)-Cu(3)-Br(2)    | 114.58(14) |
| N(2)-Cu(3)-Br(2)#4    | 109.10(15) | N(3)-Cu(3)-Br(2)    | 104.83(14) |
| Br(2)-Cu(3)-Br(2)#4   | 104.83(4)  | N(3)-Cu(3)-Br(2)#4  | 108.11(14) |
| Br(2)#4-Cu(3)-Cu(3)#4 | 54.83(3)   | Br(2)-Cu(3)-Cu(3)#4 | 55.47(3)   |
| N(3)-Cu(3)-Cu(3)#4    | 97.25(14)  | N(2)-Cu(3)-Cu(3)#4  | 147.89(15) |

Symmetry code for :

**11: #1 -x+1,-y+2,-z+2; #2 x+1/2,-y+1/2,z+1/2; #3 -x+1/2,y+1/2,-z+3/2; #4 -x,y,-z+3/2; #5 -x+1/2,y-1/2,-z+3/2; #6 x-1/2,-y+1/2,z-1/2.**

---

### Compound 12

---

|              |           |               |            |             |          |
|--------------|-----------|---------------|------------|-------------|----------|
| Sm(1)-O(1)   | 2.302(3)  | Sm(1)-O(2)#1  | 2.407(3)   | Sm(1)-O(4)  | 2.421(3) |
| Sm(1)-O(3)   | 2.807(3)  | Sm(1)-O(5)#3  | 2.572(3)   | Sm(1)-O(1W) | 2.567(3) |
| Sm(1)-O(6)#3 | 2.486(3)  | Sm(1)-O(3)#2  | 2.446(3)   | Sm(1)-O(2W) | 2.445(3) |
| Br(1)-Cu(3)  | 2.5063(9) | Br(1)-Cu(3)#4 | 2.5338(10) | Cu(3)-N(3)  | 2.031(5) |



|                     |            |                     |            |              |          |
|---------------------|------------|---------------------|------------|--------------|----------|
| Cu(3)-N(2)          | 2.039(5)   | Cu(3)-Br(1)#4       | 2.5340(10) | O(3)-Sm(1)#2 | 2.445(3) |
| O(2)-Sm(1)#1        | 2.407(3)   |                     |            |              |          |
| O(1)-Sm(1)-O(2)#1   | 99.91(11)  | O(1)-Sm(1)-O(4)     |            | 144.91(13)   |          |
| O(5)#3-Sm(1)-O(3)   | 118.07(11) | O(1W)-Sm(1)-O(3)    |            | 112.01(10)   |          |
| O(6)#3-Sm(1)-O(3)   | 71.93(11)  | O(3)#2-Sm(1)-O(3)   |            | 63.41(11)    |          |
| O(2W)-Sm(1)-O(3)    | 68.50(10)  | O(4)-Sm(1)-O(3)     |            | 48.93(10)    |          |
| O(2)#1-Sm(1)-O(3)   | 115.83(10) | O(1)-Sm(1)-O(3)     |            | 143.99(11)   |          |
| O(1W)-Sm(1)-O(5)#3  | 127.52(11) | O(6)#3-Sm(1)-O(5)#3 |            | 51.57(13)    |          |
| O(3)#2-Sm(1)-O(5)#3 | 79.09(11)  | O(2W)-Sm(1)-O(5)#3  |            | 143.43(12)   |          |
| O(4)-Sm(1)-O(5)#3   | 134.61(13) | O(2)#1-Sm(1)-O(5)#3 |            | 73.30(11)    |          |
| O(1)-Sm(1)-O(5)#3   | 74.93(13)  | O(6)#3-Sm(1)-O(1W)  |            | 142.30(11)   |          |
| O(3)#2-Sm(1)-O(1W)  | 140.44(11) | O(2W)-Sm(1)-O(1W)   |            | 69.86(11)    |          |
| O(4)-Sm(1)-O(1W)    | 72.06(11)  | O(2)#1-Sm(1)-O(1W)  |            | 71.80(11)    |          |
| O(1)-Sm(1)-O(1W)    | 73.93(12)  | O(3)#2-Sm(1)-O(6)#3 |            | 76.26(11)    |          |
| O(2W)-Sm(1)-O(6)#3  | 137.43(11) | O(4)-Sm(1)-O(6)#3   |            | 87.17(13)    |          |
| O(2)#1-Sm(1)-O(6)#3 | 73.19(11)  | O(1)-Sm(1)-O(6)#3   |            | 126.10(13)   |          |
| O(2W)-Sm(1)-O(3)#2  | 72.58(11)  | O(4)-Sm(1)-O(3)#2   |            | 112.13(10)   |          |
| O(2)#1-Sm(1)-O(3)#2 | 147.45(11) | O(1)-Sm(1)-O(3)#2   |            | 89.04(12)    |          |
| O(4)-Sm(1)-O(2W)    | 78.64(12)  | O(2)#1-Sm(1)-O(2W)  |            | 139.43(12)   |          |
| O(1)-Sm(1)-O(2W)    | 81.84(12)  | O(2)#1-Sm(1)-O(4)   |            | 77.49(11)    |          |
| N(3)-Cu(3)-N(2)     | 115.24(19) | N(3)-Cu(3)-Br(1)    |            | 115.60(13)   |          |
| Br(1)-Cu(3)-Br(1)#4 | 104.44(4)  | N(2)-Cu(3)-Br(1)#4  |            | 107.75(13)   |          |
| N(3)-Cu(3)-Br(1)#4  | 107.93(14) | N(2)-Cu(3)-Br(1)    |            | 105.13(13)   |          |

Symmetry code for :

**12: #1 -x,-y+2,-z; #2 -x,-y+1,-z; #3 x-1/2,-y+1/2,z-1/2; #4 -x,y,-z+1/2; #5 x+1/2,-**

**y+1/2,z+1/2.**

| <b>Compound 13<sup>[a]</sup></b> |            |                     |            |
|----------------------------------|------------|---------------------|------------|
| Cu(1)-I(2)                       | 2.6461(16) | Eu(1)-O(5W)         | 2.399(6)   |
| Cu(1)-I(2)#3                     | 2.6561(15) | Eu(1)-O(6W)         | 2.413(6)   |
| Cu(1)-I(1)                       | 2.6747(16) | Eu(1)-O(1)#1        | 2.445(7)   |
| Cu(1)-Cu(1)#3                    | 2.769(3)   | Eu(1)-O(3)#1        | 2.446(6)   |
| Cu(1)-Cu(2)#4                    | 2.793(2)   | Eu(1)-O(8)          | 2.454(6)   |
| Cu(2)-I(1)                       | 2.6292(15) | Eu(1)-O(7)          | 2.474(6)   |
| Cu(2)-I(1)#4                     | 2.6404(16) | Eu(1)-O(4)          | 2.479(7)   |
| Cu(2)-I(2)#4                     | 2.6793(16) | Eu(1)-O(2)#1        | 2.564(6)   |
| Cu(2)-Cu(2)#4                    | 2.776(3)   | Eu(1)-O(3)          | 2.611(6)   |
| Cu(2)-Cu(1)#4                    | 2.793(2)   | Eu(1)-Eu(1)#1       | 4.2521(9)  |
| N(1)-Cu(1)-I(2)                  | 107.2(3)   | O(6W)-Eu(1)-O(7)    | 142.6(2)   |
| N(1)-Cu(1)-I(2)#3                | 110.3(3)   | O(1)#1-Eu(1)-O(7)   | 70.0(2)    |
| I(2)-Cu(1)-I(2)#3                | 117.02(5)  | O(3)#1-Eu(1)-O(7)   | 135.11(19) |
| N(1)-Cu(1)-I(1)                  | 104.5(3)   | O(8)-Eu(1)-O(7)     | 65.44(19)  |
| I(2)-Cu(1)-I(1)                  | 116.53(6)  | O(5W)-Eu(1)-O(4)    | 79.8(2)    |
| I(2)#3-Cu(1)-I(1)                | 100.52(5)  | O(6W)-Eu(1)-O(4)    | 77.7(2)    |
| N(1)-Cu(1)-Cu(1)#3               | 128.0(3)   | O(1)#1-Eu(1)-O(4)   | 140.1(2)   |
| I(2)-Cu(1)-Cu(1)#3               | 58.69(5)   | O(3)#1-Eu(1)-O(4)   | 116.6(2)   |
| I(2)#3-Cu(1)-Cu(1)#3             | 58.33(5)   | O(8)-Eu(1)-O(4)     | 96.2(2)    |
| I(1)-Cu(1)-Cu(1)#3               | 127.00(8)  | O(7)-Eu(1)-O(4)     | 74.6(2)    |
| N(1)-Cu(1)-Cu(2)#4               | 124.8(3)   | O(5W)-Eu(1)-O(2)#1  | 76.6(2)    |
| I(2)-Cu(1)-Cu(2)#4               | 58.96(4)   | O(6W)-Eu(1)-O(2)#1  | 74.1(2)    |
| I(2)#3-Cu(1)-Cu(2)#4             | 123.69(6)  | O(1)#1-Eu(1)-O(2)#1 | 52.25(19)  |
| I(1)-Cu(1)-Cu(2)#4               | 57.71(5)   | O(3)#1-Eu(1)-O(2)#1 | 74.63(19)  |

|                           |            |                      |            |
|---------------------------|------------|----------------------|------------|
| Cu(1)#3-Cu(1)-<br>Cu(2)#4 | 92.25(7)   | O(8)-Eu(1)-O(2)#1    | 116.4(2)   |
| N(2)-Cu(2)-I(1)           | 109.87(18) | O(7)-Eu(1)-O(2)#1    | 120.8(2)   |
| N(2)-Cu(2)-I(1)#4         | 106.87(18) | O(4)-Eu(1)-O(2)#1    | 147.2(2)   |
| I(1)-Cu(2)-I(1)#4         | 116.41(5)  | O(5W)-Eu(1)-O(3)     | 122.8(2)   |
| N(2)-Cu(2)-I(2)#4         | 105.63(18) | O(6W)-Eu(1)-O(3)     | 69.3(2)    |
| I(1)-Cu(2)-I(2)#4         | 100.94(5)  | O(1)#1-Eu(1)-O(3)    | 162.3(2)   |
| I(1)#4-Cu(2)-I(2)#4       | 116.57(6)  | O(3)#1-Eu(1)-O(3)    | 65.6(2)    |
| N(2)-Cu(2)-Cu(2)#4        | 126.72(19) | O(8)-Eu(1)-O(3)      | 78.5(2)    |
| I(1)-Cu(2)-Cu(2)#4        | 58.40(5)   | O(7)-Eu(1)-O(3)      | 109.62(19) |
| I(1)#4-Cu(2)-Cu(2)#4      | 58.01(5)   | O(4)-Eu(1)-O(3)      | 50.98(19)  |
| I(2)#4-Cu(2)-Cu(2)#4      | 127.23(8)  | O(2)#1-Eu(1)-O(3)    | 129.22(19) |
| N(2)-Cu(2)-Cu(1)#4        | 118.62(18) | O(5W)-Eu(1)-Eu(1)#1  | 143.70(16) |
| I(1)-Cu(2)-Cu(1)#4        | 130.47(7)  | O(6W)-Eu(1)-Eu(1)#1  | 71.55(15)  |
| I(1)#4-Cu(2)-Cu(1)#4      | 58.91(5)   | O(1)#1-Eu(1)-Eu(1)#1 | 134.51(16) |
| I(2)#4-Cu(2)-Cu(1)#4      | 57.79(5)   | O(3)#1-Eu(1)-Eu(1)#1 | 33.99(14)  |
| Cu(2)#4-Cu(2)-<br>Cu(1)#4 | 97.09(8)   | O(8)-Eu(1)-Eu(1)#1   | 71.44(13)  |
| O(5W)-Eu(1)-O(6W)         | 73.8(2)    | O(7)-Eu(1)-Eu(1)#1   | 127.86(14) |
| O(5W)-Eu(1)-O(1)#1        | 74.8(2)    | O(4)-Eu(1)-Eu(1)#1   | 82.56(14)  |
| O(6W)-Eu(1)-O(1)#1        | 122.4(2)   | O(2)#1-Eu(1)-Eu(1)#1 | 103.64(14) |
| O(5W)-Eu(1)-O(3)#1        | 145.4(2)   | O(3)-Eu(1)-Eu(1)#1   | 31.58(13)  |
| O(6W)-Eu(1)-O(3)#1        | 80.1(2)    | Cu(2)-I(1)-Cu(2)#4   | 63.59(5)   |
| O(1)#1-Eu(1)-O(3)#1       | 101.6(2)   | Cu(2)-I(1)-Cu(1)     | 103.80(5)  |
| O(5W)-Eu(1)-O(8)          | 141.8(2)   | Cu(2)#4-I(1)-Cu(1)   | 63.39(5)   |
| O(6W)-Eu(1)-O(8)          | 143.0(2)   | Cu(1)-I(2)-Cu(1)#3   | 62.98(5)   |
| O(1)#1-Eu(1)-O(8)         | 85.7(2)    | Cu(1)-I(2)-Cu(2)#4   | 63.25(5)   |
| O(3)#1-Eu(1)-O(8)         | 70.05(19)  | Cu(1)#3-I(2)-Cu(2)#4 | 97.43(5)   |

---

O(5W)-Eu(1)-O(7) 77.0(2) Eu(1)#1-O(3)-Eu(1) 114.4(2)

---

**Compound 14<sup>[b]</sup>**

---

|                        |          |                    |           |
|------------------------|----------|--------------------|-----------|
| Gd(1)-O(7W)            | 2.382(8) | Cu(1)-N(1)         | 2.051(14) |
| Gd(1)-O(8W)            | 2.399(9) | Cu(1)-I(1)         | 2.676(2)  |
| Gd(1)-O(4)             | 2.428(9) | Cu(1)-Cu(1)#4      | 2.773(4)  |
| Gd(1)-O(1)             | 2.429(9) | Cu(1)-Cu(2)        | 2.784(3)  |
| Gd(1)-O(5)             | 2.477(9) | Cu(2)-N(2)#4       | 2.057(12) |
| Gd(1)-O(3)             | 2.551(9) | Cu(2)-I(2)#4       | 2.672(2)  |
| Gd(1)-O(6)#1           | 2.435(8) | I(2)-Cu(2)#4       | 2.672(2)  |
| Gd(1)-O(2)#2           | 2.462(9) | Cu(2)-Cu(2)#3      | 2.761(4)  |
| Gd(1)-O(4)             | 2.428(9) | Cu(2)-Cu(1)        | 2.784(3)  |
| O(7W)-Gd(1)-<br>O(8W)  | 73.2(3)  | O(8W)-Gd(1)-C(16)  | 73.0(3)   |
| O(7W)-Gd(1)-O(4)       | 122.0(3) | O(4)-Gd(1)-C(16)   | 25.8(3)   |
| O(8W)-Gd(1)-O(4)       | 75.2(3)  | O(1)-Gd(1)-C(16)   | 89.0(3)   |
| O(7W)-Gd(1)-O(1)       | 80.5(3)  | O(6)#1-Gd(1)-C(16) | 102.9(3)  |
| O(8W)-Gd(1)-O(1)       | 145.3(3) | O(2)#2-Gd(1)-C(16) | 153.0(4)  |
| O(4)-Gd(1)-O(1)        | 101.2(3) | O(5)-Gd(1)-C(16)   | 95.3(4)   |
| O(7W)-Gd(1)-<br>O(6)#1 | 143.5(3) | O(3)-Gd(1)-C(16)   | 26.2(3)   |
| O(8W)-Gd(1)-<br>O(6)#1 | 141.8(3) | O(1)#2-Gd(1)-C(16) | 152.3(3)  |
| O(4)-Gd(1)-O(6)#1      | 85.7(3)  | O(7W)-Gd(1)-C(8)#2 | 69.4(3)   |
| O(1)-Gd(1)-O(6)#1      | 70.3(3)  | O(8W)-Gd(1)-C(8)#2 | 99.9(4)   |
| O(7W)-Gd(1)-<br>O(2)#2 | 77.7(3)  | O(4)-Gd(1)-C(8)#2  | 164.1(3)  |
| O(8W)-Gd(1)-           | 80.3(3)  | O(1)-Gd(1)-C(8)#2  | 91.3(4)   |

O(2)#2

|                         |          |                      |            |
|-------------------------|----------|----------------------|------------|
| O(4)-Gd(1)-O(2)#2       | 140.9(3) | N(1)-Cu(1)-I(2)      | 110.1(4)   |
| O(1)-Gd(1)-O(2)#2       | 116.0(3) | N(1)-Cu(1)-I(2)#4    | 106.6(3)   |
| O(6)#1-Gd(1)-<br>O(2)#2 | 95.5(3)  | I(2)-Cu(1)-I(2)#4    | 116.39(8)  |
| O(7W)-Gd(1)-O(5)        | 142.3(3) | N(1)-Cu(1)-I(1)      | 105.8(4)   |
| O(8W)-Gd(1)-O(5)        | 77.3(3)  | I(2)-Cu(1)-I(1)      | 100.84(7)  |
| O(4)-Gd(1)-O(5)         | 70.5(3)  | I(2)#4-Cu(1)-I(1)    | 116.60(9)  |
| O(1)-Gd(1)-O(5)         | 135.0(3) | N(1)-Cu(1)-Cu(1)#4   | 126.6(4)   |
| O(6)#1-Gd(1)-O(5)       | 65.1(3)  | I(2)-Cu(1)-Cu(1)#4   | 58.42(7)   |
| O(2)#2-Gd(1)-O(5)       | 74.7(3)  | I(2)#4-Cu(1)-Cu(1)#4 | 57.97(7)   |
| O(7W)-Gd(1)-O(3)        | 74.1(3)  | I(1)-Cu(1)-Cu(1)#4   | 127.14(12) |
| O(8W)-Gd(1)-O(3)        | 76.7(3)  | N(1)-Cu(1)-Cu(2)     | 118.6(4)   |
| O(4)-Gd(1)-O(3)         | 51.9(3)  | I(2)-Cu(1)-Cu(2)     | 130.30(9)  |
| O(1)-Gd(1)-O(3)         | 74.6(3)  | I(2)#4-Cu(1)-Cu(2)   | 58.97(7)   |
| O(6)#1-Gd(1)-O(3)       | 116.6(3) | I(1)-Cu(1)-Cu(2)     | 57.75(7)   |
| O(2)#2-Gd(1)-O(3)       | 147.7(3) | Cu(1)#4-Cu(1)-Cu(2)  | 97.00(12)  |
| O(5)-Gd(1)-O(3)         | 120.9(3) | N(2)#4-Cu(2)-I(1)    | 106.9(3)   |
| O(7W)-Gd(1)-<br>O(1)#2  | 69.5(3)  | N(2)#4-Cu(2)-I(1)#3  | 110.7(4)   |
| O(8W)-Gd(1)-<br>O(1)#2  | 122.9(3) | I(1)-Cu(2)-I(1)#3    | 117.11(8)  |
| O(4)-Gd(1)-O(1)#2       | 161.8(3) | N(2)#4-Cu(2)-I(2)#4  | 104.4(3)   |
| O(1)-Gd(1)-O(1)#2       | 65.1(3)  | I(1)-Cu(2)-I(2)#4    | 116.71(8)  |
| O(6)#1-Gd(1)-<br>O(1)#2 | 78.4(3)  | I(1)#3-Cu(2)-I(2)#4  | 100.27(7)  |

---

|                         |          |                          |          |
|-------------------------|----------|--------------------------|----------|
| O(2)#2-Gd(1)-<br>O(1)#2 | 50.9(3)  | N(2)#4-Cu(2)-<br>Cu(2)#3 | 128.2(4) |
| O(5)-Gd(1)-O(1)#2       | 109.8(3) | I(1)-Cu(2)-Cu(2)#3       | 58.82(8) |
| O(3)-Gd(1)-O(1)#2       | 128.9(3) | I(1)#3-Cu(2)-Cu(2)#3     | 58.28(7) |
| O(7W)-Gd(1)-<br>C(16)   | 97.9(4)  |                          |          |

---

**Compound 15<sup>[c]</sup>**

---

|                         |          |                        |            |
|-------------------------|----------|------------------------|------------|
| Nd(1)-O(7W)             | 2.444(7) | Nd(1)-O(4)             | 2.640(7)   |
| Nd(1)-O(8W)             | 2.464(7) | Cu(1)-N(1)             | 2.087(10)  |
| Nd(1)-O(4)#5            | 2.481(7) | Cu(1)-I(2)             | 2.652(2)   |
| Nd(1)-O(1)#6            | 2.485(8) | Cu(1)-I(2)#3           | 2.6559(19) |
| Nd(1)-O(5)#1            | 2.494(7) | Cu(1)-I(1)             | 2.6795(19) |
| Nd(1)-O(3)              | 2.522(8) | Cu(1)-Cu(1)#3          | 2.793(3)   |
| Nd(1)-O(2)#6            | 2.591(8) | Cu(1)-Cu(2)            | 2.814(3)   |
| O(7W)-Nd(1)-<br>O(8W)   | 73.4(2)  | N(1)-Cu(1)-I(2)        | 107.1(3)   |
| O(7W)-Nd(1)-<br>O(4)#5  | 145.8(2) | N(1)-Cu(1)-I(2)#3      | 110.3(3)   |
| O(8W)-Nd(1)-<br>O(4)#5  | 80.7(2)  | I(2)-Cu(1)-I(2)#3      | 116.50(7)  |
| O(7W)-Nd(1)-<br>O(1)#6  | 74.6(2)  | N(1)-Cu(1)-I(1)        | 104.5(3)   |
| O(8W)-Nd(1)-<br>O(1)#6  | 121.8(3) | I(2)-Cu(1)-I(1)        | 116.31(7)  |
| O(4)#5-Nd(1)-<br>O(1)#6 | 101.7(3) | I(2)#3-Cu(1)-I(1)      | 101.49(7)  |
| O(7W)-Nd(1)-<br>O(5)#1  | 78.1(2)  | N(1)-Cu(1)-<br>Cu(1)#3 | 127.5(3)   |

---

|                         |          |                          |            |
|-------------------------|----------|--------------------------|------------|
| O(8W)-Nd(1)-<br>O(5)#1  | 143.1(3) | I(2)-Cu(1)-Cu(1)#3       | 58.32(6)   |
| O(4)#5-Nd(1)-<br>O(5)#1 | 133.7(2) | I(2)#3-Cu(1)-<br>Cu(1)#3 | 58.18(6)   |
| O(1)#6-Nd(1)-<br>O(5)#1 | 70.8(3)  | I(1)-Cu(1)-Cu(1)#3       | 127.61(10) |
| O(7W)-Nd(1)-O(6)        | 142.3(2) | N(1)-Cu(1)-Cu(2)         | 124.4(3)   |
| O(8W)-Nd(1)-O(6)        | 142.7(2) | I(2)-Cu(1)-Cu(2)         | 58.88(5)   |
| O(4)#5-Nd(1)-O(6)       | 69.3(2)  | I(2)#3-Cu(1)-Cu(2)       | 124.24(8)  |
| O(1)#6-Nd(1)-O(6)       | 86.7(3)  | I(1)-Cu(1)-Cu(2)         | 57.56(5)   |
| O(5)#1-Nd(1)-O(6)       | 64.8(2)  | Cu(1)#3-Cu(1)-<br>Cu(2)  | 92.54(9)   |
| O(7W)-Nd(1)-O(3)        | 79.6(3)  | N(2)-Cu(2)-I(1)#4        | 111.1(3)   |
| O(8W)-Nd(1)-O(3)        | 77.5(3)  | N(2)-Cu(2)-I(1)          | 106.6(3)   |
| O(4)#5-Nd(1)-O(3)       | 116.4(2) | I(1)#4-Cu(2)-I(1)        | 116.45(7)  |
| O(1)#6-Nd(1)-O(3)       | 140.2(2) | N(2)-Cu(2)-I(2)          | 104.6(3)   |
| O(5)#1-Nd(1)-O(3)       | 74.6(3)  | I(1)#4-Cu(2)-I(2)        | 101.49(6)  |
| O(6)-Nd(1)-O(3)         | 96.0(3)  | I(1)-Cu(2)-I(2)          | 116.10(7)  |
| O(7W)-Nd(1)-<br>O(2)#6  | 76.2(3)  | N(2)-Cu(2)-<br>Cu(2)#4   | 127.8(3)   |
| O(8W)-Nd(1)-<br>O(2)#6  | 75.0(3)  | I(1)#4-Cu(2)-<br>Cu(2)#4 | 58.57(6)   |
| O(4)#5-Nd(1)-<br>O(2)#6 | 75.7(2)  | I(1)-Cu(2)-Cu(2)#4       | 57.88(6)   |
| O(1)#6-Nd(1)-<br>O(2)#6 | 50.7(2)  | I(2)-Cu(2)-Cu(2)#4       | 127.42(10) |
| O(5)#1-Nd(1)-<br>O(2)#6 | 120.3(3) | N(2)-Cu(2)-Cu(1)         | 117.1(3)   |

---

|                        |          |                         |           |
|------------------------|----------|-------------------------|-----------|
| O(6)-Nd(1)-O(2)#6      | 116.3(3) | I(1)#4-Cu(2)-Cu(1)      | 130.75(8) |
| O(3)-Nd(1)-O(2)#6      | 147.6(3) | I(1)-Cu(2)-Cu(1)        | 58.67(5)  |
| O(7W)-Nd(1)-O(4)       | 121.9(2) | I(2)-Cu(2)-Cu(1)        | 57.56(5)  |
| O(8W)-Nd(1)-O(4)       | 69.1(2)  | Cu(2)#4-Cu(2)-<br>Cu(1) | 97.00(9)  |
| O(4)#5-Nd(1)-O(4)      | 66.1(3)  | N(1)-Cu(1)-I(2)         | 107.1(3)  |
| O(1)#6-Nd(1)-O(4)      | 163.4(2) | N(1)-Cu(1)-I(2)#3       | 110.3(3)  |
| O(5)#1-Nd(1)-O(4)      | 108.7(2) | I(2)-Cu(1)-I(2)#3       | 116.50(7) |
| O(6)-Nd(1)-O(4)        | 78.6(2)  | N(1)-Cu(1)-I(1)         | 104.5(3)  |
| O(3)-Nd(1)-O(4)        | 50.3(2)  | I(2)-Cu(1)-I(1)         | 116.31(7) |
| O(2)#6-Nd(1)-O(4)      | 130.6(2) | I(2)#3-Cu(1)-I(1)       | 101.49(7) |
| Nd(1)#5-O(4)-<br>Nd(1) | 113.9(3) | N(1)-Cu(1)-<br>Cu(1)#3  | 127.5(3)  |

---

**Compound 16<sup>[d]</sup>**

---

|                         |           |                    |           |
|-------------------------|-----------|--------------------|-----------|
| Gd(1)-O(4)#2            | 2.368(9)  | Cu(1)-Br(2)#5      | 2.444(3)  |
| Gd(1)-O(2)#3            | 2.403(9)  | Cu(1)-Cu(1)#5      | 2.746(5)  |
| Gd(1)-O(5)              | 2.403(10) | Cu(1)-Cu(2)#4      | 2.801(3)  |
| Gd(1)-O(7W)             | 2.404(11) | Cu(2)-N(2)#3       | 2.029(16) |
| Gd(1)-O(6)#1            | 2.442(9)  | Cu(2)-Br(2)#7      | 2.528(3)  |
| Gd(1)-O(3)              | 2.489(10) | Cu(2)-Br(1)#4      | 2.634(3)  |
| Gd(1)-O(1)              | 2.490(9)  | Cu(2)-Cu(1)#4      | 2.801(3)  |
| Gd(1)-O(2)              | 2.491(9)  | Cu(1)-Br(2)#5      | 2.444(3)  |
| O(4)#2-Gd(1)-<br>O(2)#3 | 151.1(3)  | O(1)-Gd(1)-O(4)    | 132.2(3)  |
| O(4)#2-Gd(1)-O(5)       | 85.6(3)   | O(2)-Gd(1)-O(4)    | 145.1(3)  |
| O(2)#3-Gd(1)-O(5)       | 76.6(3)   | N(1)-Cu(1)-Br(2)#5 | 110.4(2)  |



|                         |          |                           |            |
|-------------------------|----------|---------------------------|------------|
| O(4)#2-Gd(1)-<br>O(7W)  | 81.5(4)  | N(1)-Cu(1)-Br(1)          | 109.5(2)   |
| O(2)#3-Gd(1)-<br>O(7W)  | 126.7(4) | Br(2)#5-Cu(1)-Br(1)       | 116.64(11) |
| O(5)-Gd(1)-O(7W)        | 138.0(4) | N(1)-Cu(1)-Br(2)          | 104.8(2)   |
| O(4)#2-Gd(1)-<br>O(6)#1 | 77.3(3)  | Br(2)#5-Cu(1)-Br(2)       | 113.76(10) |
| O(2)#3-Gd(1)-<br>O(6)#1 | 74.8(3)  | Br(1)-Cu(1)-Br(2)         | 100.77(11) |
| O(5)-Gd(1)-O(6)#1       | 66.6(3)  | N(1)-Cu(1)-Cu(1)#5        | 123.4(3)   |
| O(7W)-Gd(1)-<br>O(6)#1  | 145.9(3) | Br(2)#5-Cu(1)-<br>Cu(1)#5 | 59.23(9)   |
| O(4)#2-Gd(1)-O(3)       | 114.9(3) | Br(1)-Cu(1)-<br>Cu(1)#5   | 125.05(14) |
| O(2)#3-Gd(1)-O(3)       | 73.1(3)  | Br(2)-Cu(1)-<br>Cu(1)#5   | 54.53(9)   |
| O(5)-Gd(1)-O(3)         | 146.2(3) | N(1)-Cu(1)-Cu(2)#4        | 128.2(2)   |
| O(7W)-Gd(1)-O(3)        | 74.2(4)  | Br(2)#5-Cu(1)-<br>Cu(2)#4 | 57.16(8)   |
| O(6)#1-Gd(1)-O(3)       | 90.9(4)  | Br(1)-Cu(1)-<br>Cu(2)#4   | 59.54(9)   |
| O(4)#2-Gd(1)-O(1)       | 80.5(3)  | Br(2)-Cu(1)-<br>Cu(2)#4   | 126.67(11) |
| O(2)#3-Gd(1)-O(1)       | 113.4(3) | Cu(1)#5-Cu(1)-<br>Cu(2)#4 | 94.48(12)  |
| O(5)-Gd(1)-O(1)         | 69.7(3)  | N(2)#3-Cu(2)-Br(1)        | 125.5(2)   |
| O(7W)-Gd(1)-O(1)        | 68.8(4)  | N(2)#3-Cu(2)-<br>Br(2)#7  | 108.3(2)   |
| O(6)#1-Gd(1)-O(1)       | 131.9(3) | Br(1)-Cu(2)-Br(2)#7       | 104.78(11) |

---

|                   |          |                           |            |
|-------------------|----------|---------------------------|------------|
| O(3)-Gd(1)-O(1)   | 137.2(4) | N(2)#3-Cu(2)-<br>Br(1)#4  | 103.7(3)   |
| O(4)#2-Gd(1)-O(2) | 133.3(3) | Br(1)-Cu(2)-Br(1)#4       | 105.43(10) |
| O(2)#3-Gd(1)-O(2) | 66.6(4)  | Br(2)#7-Cu(2)-<br>Br(1)#4 | 108.30(10) |
| O(5)-Gd(1)-O(2)   | 81.3(3)  | N(2)#3-Cu(2)-<br>Cu(1)#4  | 120.1(2)   |
| O(7W)-Gd(1)-O(2)  | 79.1(4)  | Br(1)-Cu(2)-<br>Cu(1)#4   | 114.41(11) |
| O(6)#1-Gd(1)-O(2) | 134.4(3) | Br(2)#7-Cu(2)-<br>Cu(1)#4 | 54.30(8)   |
| O(3)-Gd(1)-O(2)   | 100.0(3) | Br(1)#4-Cu(2)-<br>Cu(1)#4 | 54.05(8)   |
| O(1)-Gd(1)-O(2)   | 52.9(3)  | N(1)-Cu(1)-Br(2)#5        | 110.4(2)   |
| O(4)#2-Gd(1)-O(4) | 64.4(4)  | N(1)-Cu(1)-Br(1)          | 109.5(2)   |
| O(2)#3-Gd(1)-O(4) | 112.9(3) | Br(2)#5-Cu(1)-Br(1)       | 116.64(11) |
| O(5)-Gd(1)-O(4)   | 133.5(3) | N(1)-Cu(1)-Br(2)          | 104.8(2)   |
| O(7W)-Gd(1)-O(4)  | 74.5(3)  | Br(2)#5-Cu(1)-Br(2)       | 113.76(10) |
| O(6)#1-Gd(1)-O(4) | 72.4(3)  | Br(1)-Cu(1)-Br(2)         | 100.77(11) |
| O(3)-Gd(1)-O(4)   | 51.1(3)  | N(1)-Cu(1)-Cu(1)#5        | 123.4(3)   |

---

**Compound 17<sup>le</sup>**

---

|               |           |              |          |
|---------------|-----------|--------------|----------|
| Cu(1)-N(1)    | 2.009(10) | Tb(1)-O(3)#5 | 2.408(7) |
| Cu(1)-Br(2)#6 | 2.417(2)  | Tb(1)-O(6)#5 | 2.416(7) |
| Cu(1)-Br(2)#1 | 2.630(2)  | Tb(1)-O(3)#7 | 2.457(7) |
| Cu(1)-Cu(2)#1 | 2.794(2)  | Tb(1)-O(4)#7 | 2.483(7) |
| Cu(2)-N(2)    | 2.013(10) | Tb(1)-O(2)#3 | 2.488(7) |
| Cu(2)-Br(1)#1 | 2.443(2)  | Tb(1)-O(1)#3 | 2.569(7) |

---

|                           |           |                         |           |
|---------------------------|-----------|-------------------------|-----------|
| Cu(2)-Cu(2)#1             | 2.736(4)  | Tb(1)-C(16)#7           | 2.838(11) |
| Cu(2)-Cu(1)#1             | 2.794(2)  | Tb(1)-C(8)#3            | 2.931(10) |
| Cu(2)#1-Br(1)-<br>Cu(1)   | 68.46(7)  | O(5)-Tb(1)-O(3)#5       | 76.4(3)   |
| Cu(2)#1-Br(1)-<br>Cu(2)   | 66.07(8)  | O(1)-Tb(1)-O(6)#5       | 77.8(2)   |
| Cu(1)-Br(1)-Cu(2)         | 105.44(8) | O(5)-Tb(1)-O(6)#5       | 66.9(2)   |
| Cu(1)#2-Br(2)-<br>Cu(2)   | 100.50(8) | O(3)#5-Tb(1)-<br>O(6)#5 | 74.9(2)   |
| Cu(1)#2-Br(2)-<br>Cu(1)#1 | 74.69(8)  | O(1)-Tb(1)-O(7W)        | 81.6(3)   |
| Cu(2)-Br(2)-<br>Cu(1)#1   | 66.23(6)  | O(5)-Tb(1)-O(7W)        | 138.2(3)  |
| N(1)-Cu(1)-Br(2)#6        | 124.0(3)  | O(3)#5-Tb(1)-<br>O(7W)  | 126.3(3)  |
| N(1)-Cu(1)-Br(1)          | 109.1(3)  | O(6)#5-Tb(1)-<br>O(7W)  | 145.9(3)  |
| Br(2)#6-Cu(1)-Br(1)       | 104.67(8) | O(1)-Tb(1)-O(3)#7       | 132.9(2)  |
| N(1)-Cu(1)-Br(2)#1        | 104.4(3)  | O(5)-Tb(1)-O(3)#7       | 80.9(2)   |
| Br(2)#6-Cu(1)-<br>Br(2)#1 | 105.31(8) | O(3)#5-Tb(1)-<br>O(3)#7 | 66.3(3)   |
| Br(1)-Cu(1)-Br(2)#1       | 108.64(7) | O(6)#5-Tb(1)-<br>O(3)#7 | 134.3(2)  |
| N(1)-Cu(1)-Cu(2)#1        | 121.7(3)  | O(7W)-Tb(1)-<br>O(3)#7  | 79.1(3)   |
| Br(2)#6-Cu(1)-<br>Cu(2)#1 | 114.22(8) | O(1)-Tb(1)-O(4)#7       | 80.1(2)   |
| Br(1)-Cu(1)-<br>Cu(2)#1   | 54.42(6)  | O(5)-Tb(1)-O(4)#7       | 70.5(2)   |
| Br(2)#1-Cu(1)-<br>Cu(2)#1 | 54.28(6)  | O(3)#5-Tb(1)-<br>O(4)#7 | 113.5(2)  |
| N(2)-Cu(2)-Br(1)#1        | 111.4(3)  | O(6)#5-Tb(1)-           | 132.9(2)  |

---

---

|                           |            |                         |          |
|---------------------------|------------|-------------------------|----------|
|                           |            | O(4)#7                  |          |
| N(2)-Cu(2)-Br(2)          | 109.0(3)   | O(7W)-Tb(1)-<br>O(4)#7  | 68.1(3)  |
| Br(1)#1-Cu(2)-Br(2)       | 116.54(8)  | O(3)#7-Tb(1)-<br>O(4)#7 | 52.8(2)  |
| N(2)-Cu(2)-Br(1)          | 104.3(3)   | O(1)-Tb(1)-O(2)#3       | 115.3(2) |
| Br(1)#1-Cu(2)-Br(1)       | 113.93(8)  | O(5)-Tb(1)-O(2)#3       | 145.4(3) |
| Br(2)-Cu(2)-Br(1)         | 100.44(8)  | O(3)#5-Tb(1)-<br>O(2)#3 | 72.7(2)  |
| N(2)-Cu(2)-Cu(2)#1        | 124.0(3)   | O(6)#5-Tb(1)-<br>O(2)#3 | 90.0(3)  |
| Br(1)#1-Cu(2)-<br>Cu(2)#1 | 59.23(7)   | O(7W)-Tb(1)-<br>O(2)#3  | 74.7(3)  |
| Br(2)-Cu(2)-<br>Cu(2)#1   | 124.70(11) | O(3)#7-Tb(1)-<br>O(2)#3 | 100.3(2) |
| Br(1)-Cu(2)-<br>Cu(2)#1   | 54.70(7)   | O(4)#7-Tb(1)-<br>O(2)#3 | 137.0(3) |
| N(2)-Cu(2)-Cu(1)#1        | 128.7(3)   | O(1)-Tb(1)-O(1)#3       | 64.5(3)  |
| Br(1)#1-Cu(2)-<br>Cu(1)#1 | 57.12(6)   | O(5)-Tb(1)-O(1)#3       | 134.0(2) |
| Br(2)-Cu(2)-<br>Cu(1)#1   | 59.49(6)   | O(3)#5-Tb(1)-<br>O(1)#3 | 113.6(2) |
| Br(1)-Cu(2)-<br>Cu(1)#1   | 126.51(8)  | O(6)#5-Tb(1)-<br>O(1)#3 | 72.7(2)  |
| Cu(2)#1-Cu(2)-<br>Cu(1)#1 | 94.27(9)   | O(7W)-Tb(1)-<br>O(1)#3  | 74.0(2)  |
| Tb(1)#5-O(3)-<br>Tb(1)#4  | 113.7(3)   | O(3)#7-Tb(1)-<br>O(1)#3 | 145.1(2) |
| O(1)-Tb(1)-O(5)           | 85.8(2)    | O(4)#7-Tb(1)-<br>O(1)#3 | 131.1(2) |
| O(1)-Tb(1)-O(3)#5         | 151.6(2)   | O(2)#3-Tb(1)-<br>O(1)#3 | 51.4(2)  |

---

Symmetry code for :

13-17:

[a] #1 -x+1,-y+2,-z+2; #2 -x+1,-y+3,-z+2; #3 -x+3,-y+2,-z+1; #4 -x+2,-y+2,-z+1.

[b] #1 -x+2,-y+1,-z+1; #2 -x+2,-y,-z+1; #3 -x+2,-y,-z+2; #4 -x+1,-y,-z+2.

[c] #1 -x+1,-y,-z; #2 x-1,y,z+1; #3 -x+1,-y+1,-z+1; #4 -x,-y+1,-z+1; #5 -x+1,-y+1,-z;  
#6 x+1,y,z-1.

[d] #1 -x+1,-y+1,-z+1; #2 -x+1,-y,-z+1; #3 -x,-y+1,-z+1; #4 -x,-y+2,-z; #5 -x,-y+1,-z;  
#6 x,y-1,z; #7 x,y+1,z.

[e] #1 -x+2,-y+1,-z; #2 x,y+1,z; #3 -x+1,-y,-z+1; #4 x+1,y,z; #5 -x+1,-y+1,-z+1; #6  
x,y-1,z; #7 x-1,y,z.

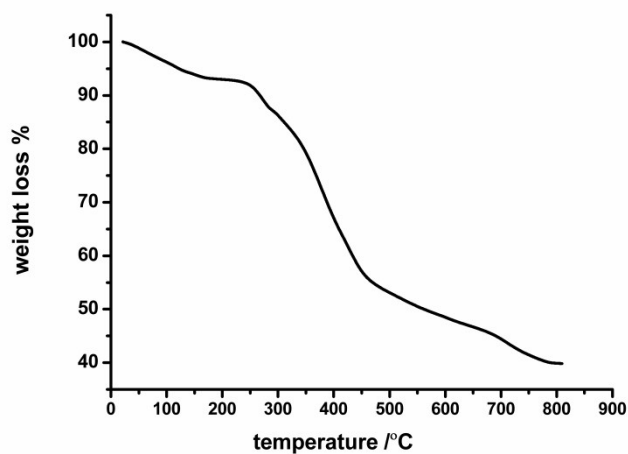

**Fig. S1.** The thermogravimetric analysis (TGA) curve of compounds **1**.

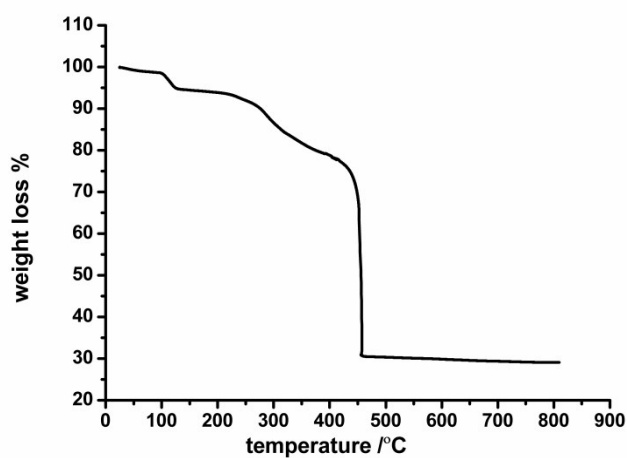

**Fig. S2.** The thermogravimetric analysis (TGA) curve of compounds **5**.

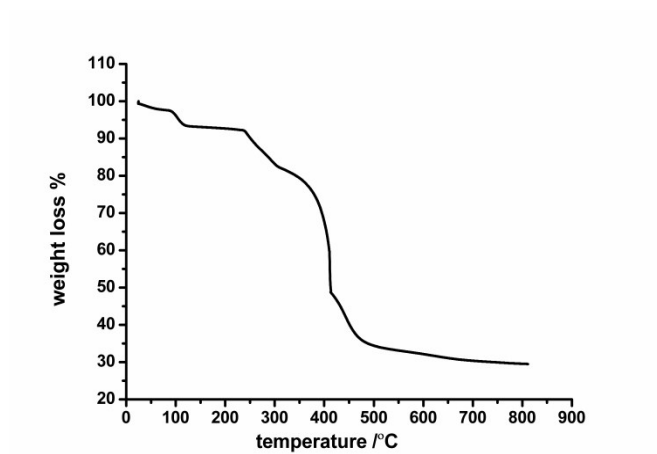

**Fig. S3.** The thermogravimetric analysis (TGA) curve of compounds **9**.

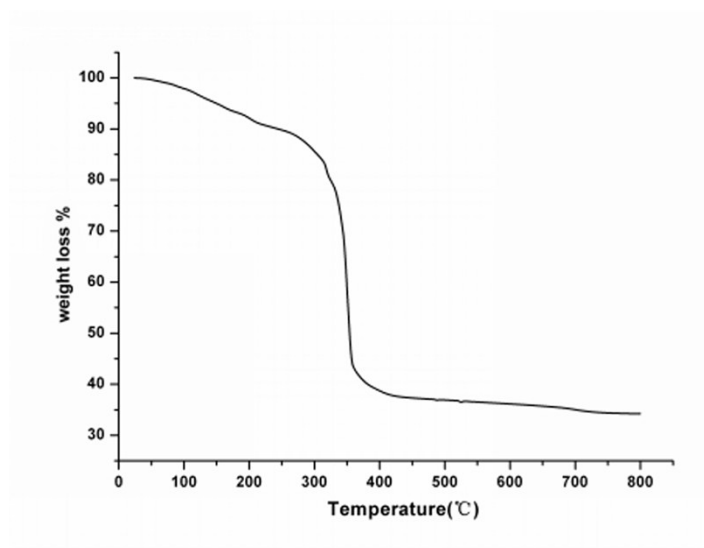

**Fig. S4.** The thermogravimetric analysis (TGA) curve of compounds **14**.

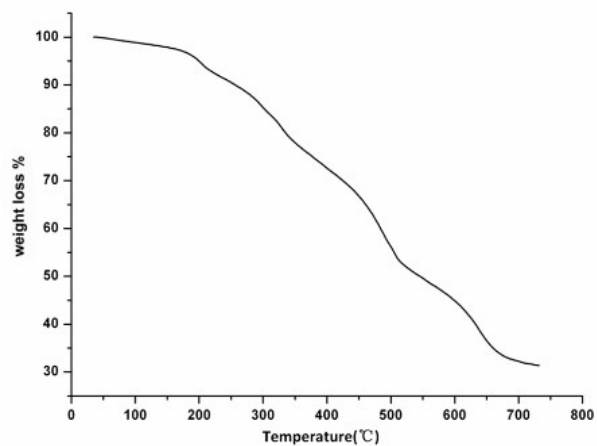

**Fig. S5.** The thermogravimetric analysis (TGA) curve of compounds **16**.

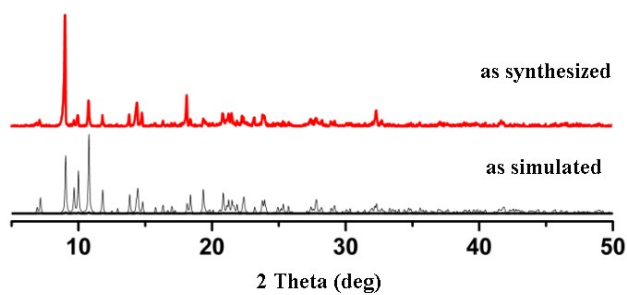

**Fig. S6** Powder X-ray diffraction measurements (PXRD) patterns for **1**.

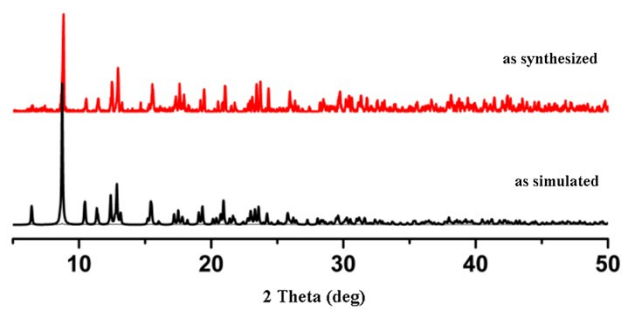

**Fig. S7** Powder X-ray diffraction measurements (PXRD) patterns for **5**.

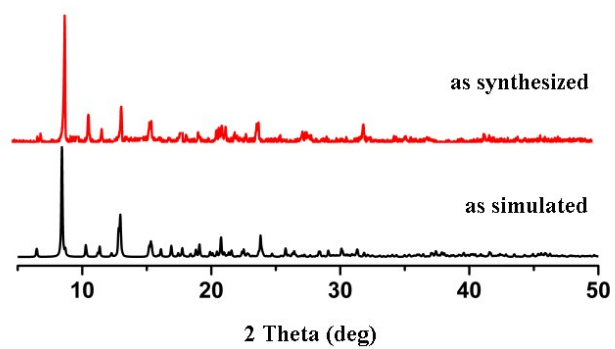

**Fig. S8** Powder X-ray diffraction measurements (PXRD) patterns for **9**.

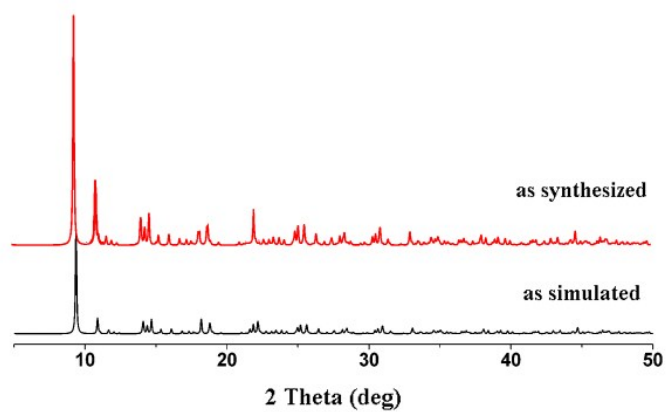

**Fig. S9** Powder X-ray diffraction measurements (PXRD) patterns for **14**.



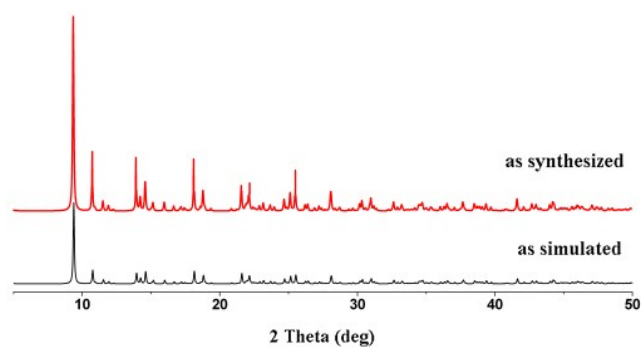

**Fig. S10** Powder X-ray diffraction measurements (PXRD) patterns for **16**.

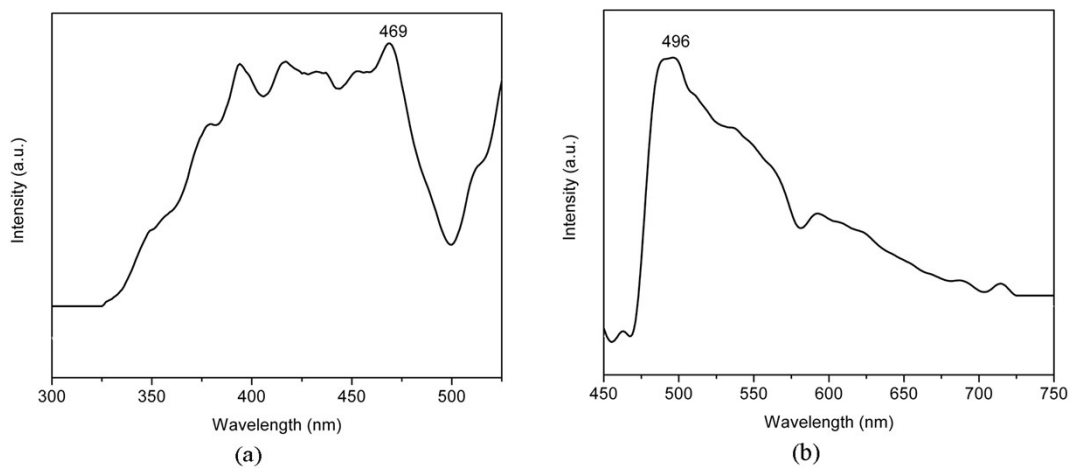

**Fig. S11** (a) Solide-state excitation spectra of **12** at room temperature. (b) Solide-state excitation spectra of **15** at room temperature.

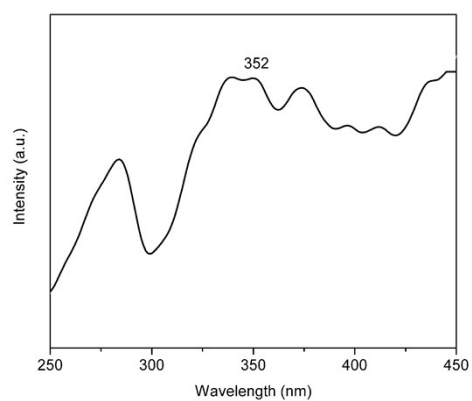

**Fig. S12** Solide-state excitation spectra of **4** at room temperature.

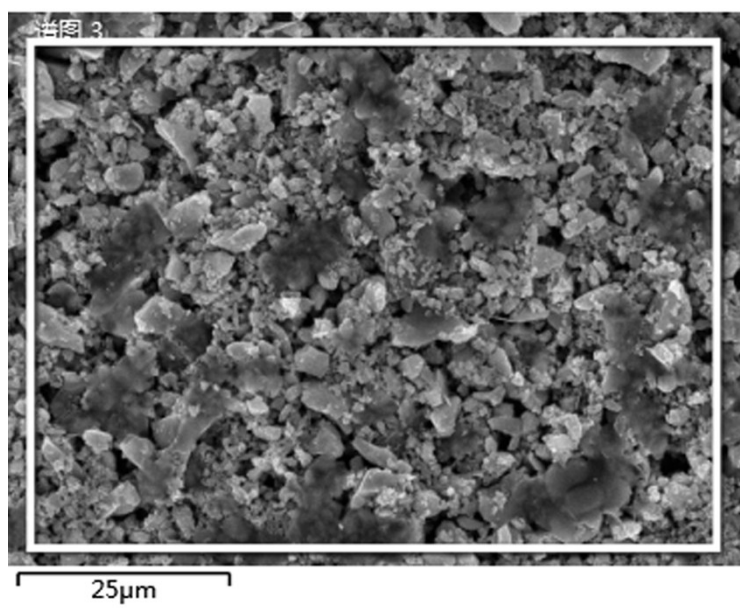

**Fig. S13** A typical TEM image of **15**.
